# Supplementary material for: Cryptic Diversity in the Neotropical Gecko GenusPhyllopezusPeters, 1878 (Reptilia: Squamata: Phyllodactylidae): A New Species from Paraguay
Source: Hindawi journal article supplement (doi:10.1155/2018/3958327), 2018-07-16
Supplement: f1 [file 3958327.f1.pdf]

## Supplementary Material

| <u>Section</u>                                                                            | <u>Page</u>        |
|-------------------------------------------------------------------------------------------|--------------------|
| Appendix S1: Environmental traits of <i>Phyllopezus</i> habitats in Paraguay. . . . .     | <a href="#">1</a>  |
| Appendix S2: Genbank accession numbers of sequences used in this work. . . . .            | <a href="#">4</a>  |
| Appendix S3: Pairwise genetic distances (16S). . . . .                                    | <a href="#">6</a>  |
| Appendix S4: Results of the ABGD assessment. . . . .                                      | <a href="#">7</a>  |
| Figure S1: Scales between 4 <sup>th</sup> and 5 <sup>th</sup> digital pads. . . . .       | <a href="#">12</a> |
| Figure S2: Phylogenetic tree inferred from 16S using BI approach. . . . .                 | <a href="#">13</a> |
| Figure S3: Phylogenetic tree inferred from 16S using ML approach. . . . .                 | <a href="#">14</a> |
| Figure S4: Phylogenetic tree inferred from Cytb using BI approach. . . . .                | <a href="#">15</a> |
| Figure S5: Phylogenetic tree inferred from Cytb using ML approach. . . . .                | <a href="#">16</a> |
| Figure S6: Phylogenetic tree inferred from ND2 using BI approach. . . . .                 | <a href="#">17</a> |
| Figure S7: Phylogenetic tree inferred from ND2 using ML approach. . . . .                 | <a href="#">18</a> |
| Figure S8: Phylogenetic tree inferred from concatenated genes, using BI approach. . . . . | <a href="#">19</a> |
| Figure S9: Phylogenetic tree inferred from concatenated genes, using ML approach. . . . . | <a href="#">20</a> |
| Figure S10: Dorsal scalation. . . . .                                                     | <a href="#">21</a> |
| Figure S11: Head and lateral body scalation. . . . .                                      | <a href="#">22</a> |
| Figure S12: Ear opening. . . . .                                                          | <a href="#">23</a> |
| Figure S13: Mental scalation. . . . .                                                     | <a href="#">24</a> |
| Figure S14: Lateral scalation of the head. . . . .                                        | <a href="#">25</a> |
| Figure S15: Prescapular scalation. . . . .                                                | <a href="#">26</a> |

## Appendix S1

### Environmental traits of *Phyllopezus* habitats in Paraguay.

#### Dry Chaco

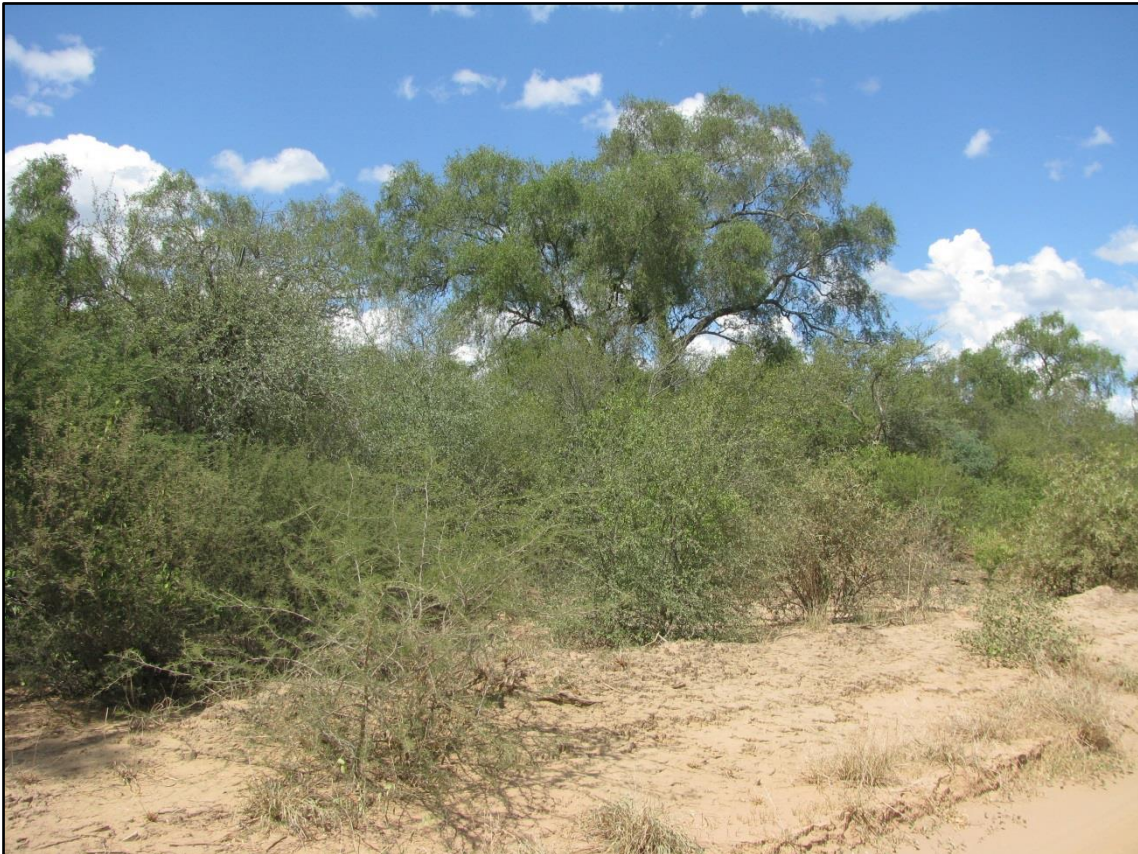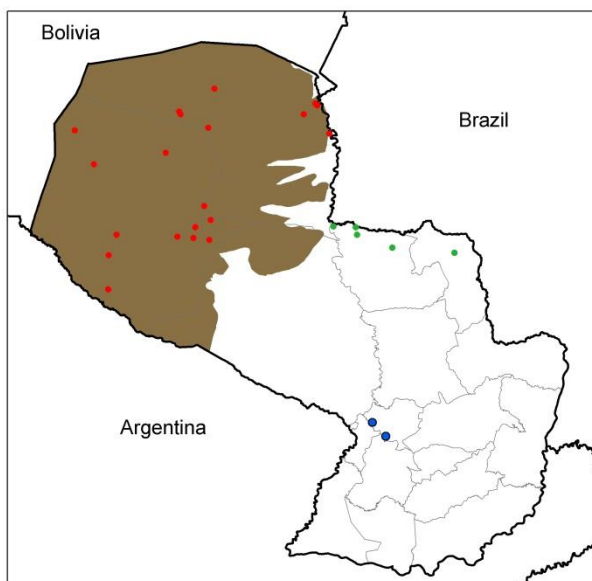

The Dry Chaco is a xerophytic environment adapted to low precipitation (400–700 mm/yr). The vegetation is implanted on clayish soils, with a dominance of thorny shrubs and cacti, and no herbaceous stratum. In this environment, *Phyllopezus* is mostly a ground dweller, but also frequently seen on trees.

Distribution of Dry Chaco in Paraguay (brown area), showing the different populations of *Phyllopezus*: Dry Chaco (red dots), Cerrado population (green dots), and Cordillera de los Altos population (blue dots).

## Cerrado

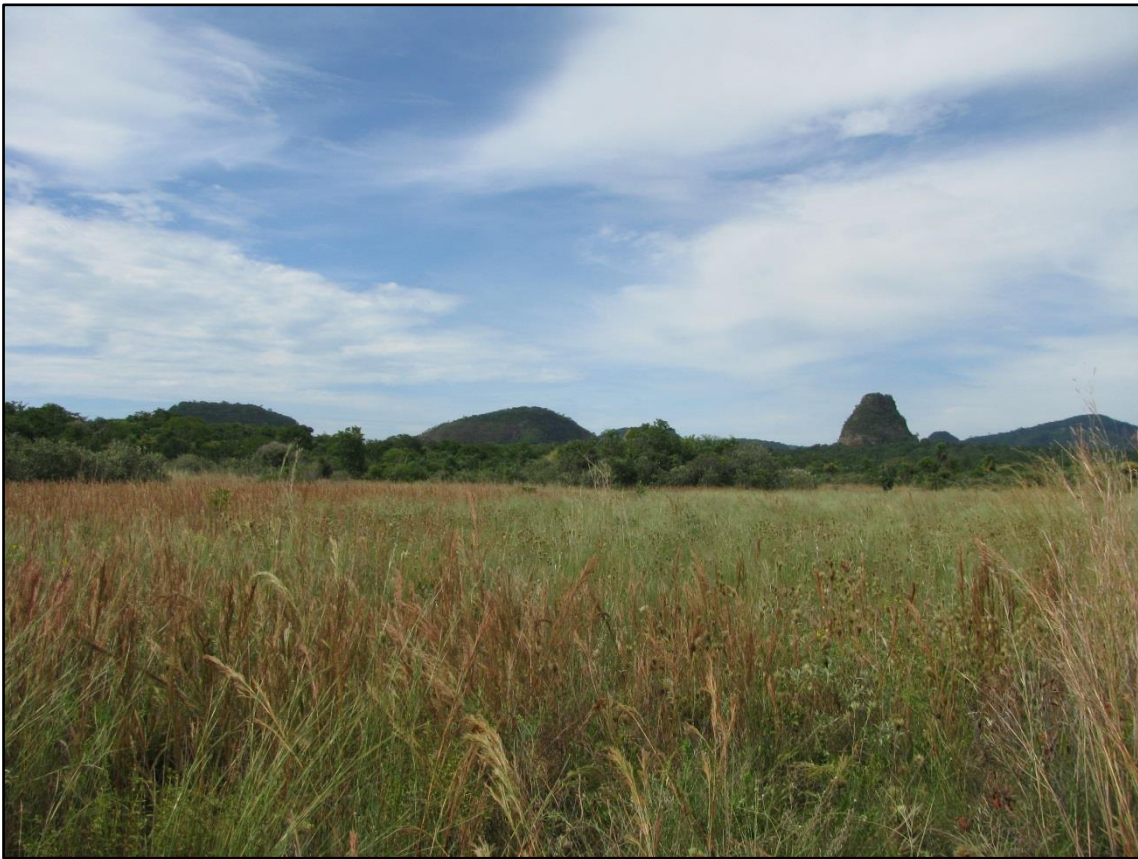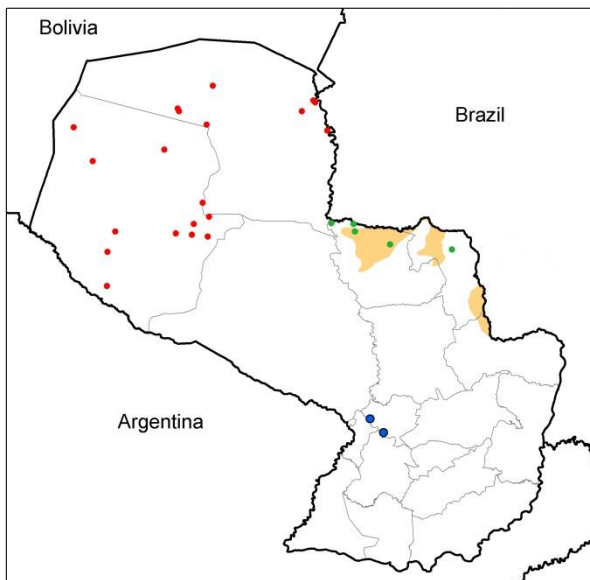

The Cerrado is a Neotropical savanna dominated by grasses adapted to periodic fires. Associated to this environment, there are islands of tortuous small trees with cork-like bark. There are also tall green forests along the rivers or streams present in the area.

In this environment, *Phyllopezus* is exclusively a ground dweller, inhabiting the rocky hills scattered on the area.

Distribution of Cerrado in Paraguay (orange area), showing the different populations of *Phyllopezus*: Dry Chaco (red dots), Cerrado population (green dots), and Cordillera de los Altos population (blue dots).

### **Cordillera de Los Altos (Litoral Central ecoregion)**

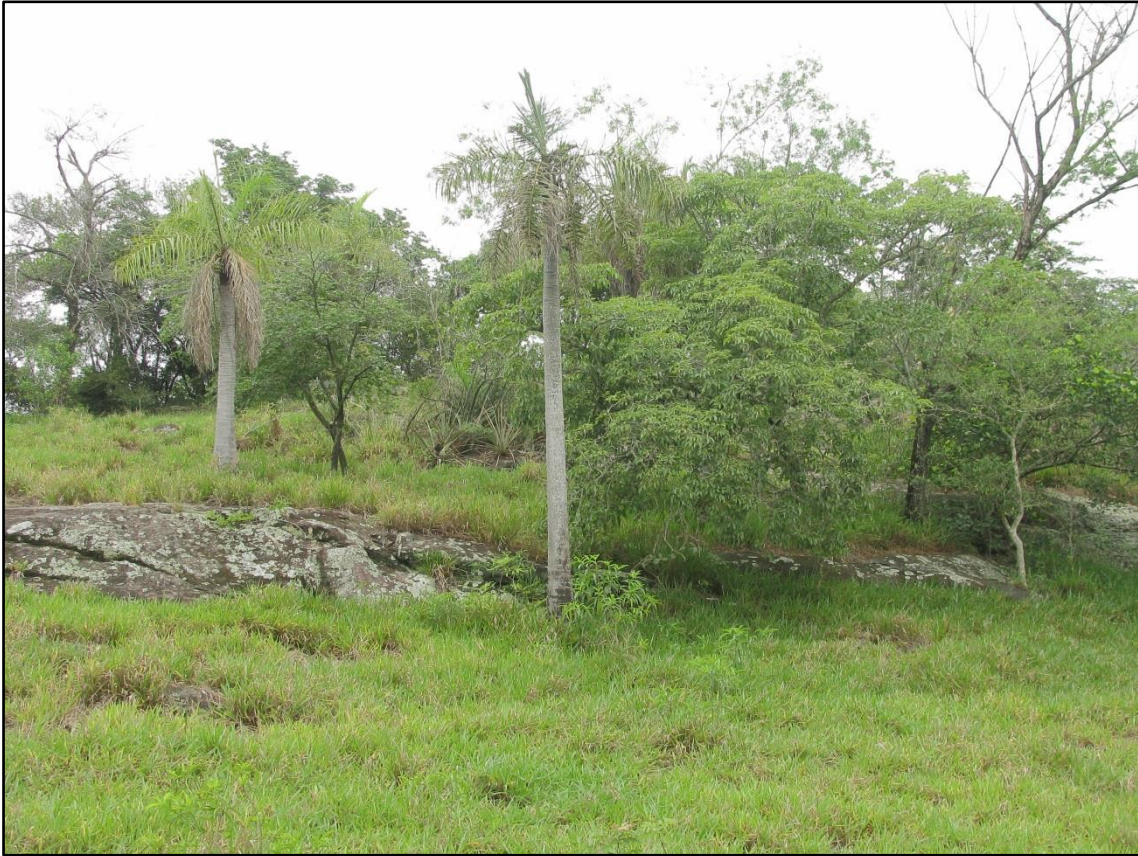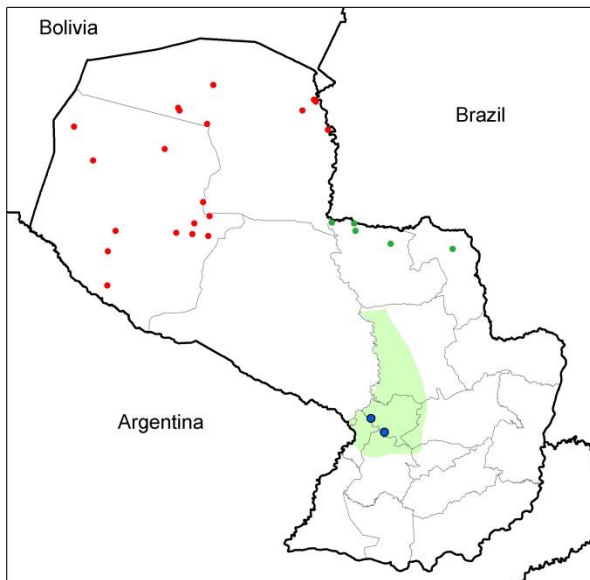

Cordillera de Los Altos is a chain of rocky hills of up to 450 masl, located in the south of the Litoral Central ecoregion. The environment has components of the Humid Chaco, with grasses and shrubs covering most of the area, tall forests and abundance of the Paraguayan coconut palm *Acrocomia aculeata*.

In this environment, *Phyllopezus* is a ground dweller, inhabiting the rocky hills where the lizard is mimetic with the lichens on the stones.

Distribution of Litoral Central in Paraguay (green area), showing the different populations of *Phyllopezus*: Dry Chaco (red dots), Cerrado population (green dots), and Cordillera de los Altos population (blue dots).

## Appendix S2

Genbank accession numbers of sequences used in this work.

| Species                         | Voucher               | 16S      | Cytb     | ND2      |
|---------------------------------|-----------------------|----------|----------|----------|
| <i>Phyllodactylus unctus</i>    |                       | HQ896027 |          |          |
| <i>Phyllopezus lutzae</i>       | CHUNB 50461           | JN935548 | MD       | MD       |
| <i>Phyllopezus lutzae</i>       | CHUNB 50463           | JN935550 | MD       | MD       |
| <i>P. maranjonensis</i>         | ZFMK 84995            | JN935555 | JQ826820 | MD       |
| <i>P. maranjonensis</i>         | ZFMK 84996            | JN935556 | MD       | JX041416 |
| <i>P. maranjonensis</i>         | ZFMK 84997            | JN935557 | MD       | MD       |
| <i>P. periosus</i>              | CHUNB 61920           | MD       | JQ826827 | MD       |
| <i>P. periosus</i>              | CHUNB 61921           | MD       | JQ826826 | MD       |
| <i>P. periosus</i>              | FRD 851               | MD       | JQ826824 | MD       |
| <i>P. periosus</i>              | MTR 887022            | JN935552 | MD       | MD       |
| <i>P. pollicaris</i> Clade I    | JC 1153               | MD       | JQ826836 | MD       |
| <i>P. pollicaris</i> Clade I    | JC 1182               | MD       | JQ826834 | MD       |
| <i>P. pollicaris</i> Clade I    | JC 1185               | JN935553 | JQ826838 | MD       |
| <i>P. pollicaris</i> Clade I    | JC 1219               | JN935554 | MD       | MD       |
| <i>P. pollicaris</i> Clade II   | PV 1053               | MD       | JQ826840 | JQ825289 |
| <i>P. pollicaris</i> Clade II   | PV 1059               | MD       | JQ826841 | JQ825290 |
| <i>P. pollicaris</i> Clade II   | CHUNB 55904           | MD       | JQ826842 | JQ825288 |
| <i>P. pollicaris</i> Clade III  | JC 1503               | MD       | JQ826958 | JQ825294 |
| <i>P. pollicaris</i> Clade III  | MTR 13452             | MD       | JQ826955 | JQ825291 |
| <i>P. pollicaris</i> Clade III  | MTR 887703            | MD       | MD       | JQ825293 |
| <i>P. pollicaris</i> Clade IV   | LG 1309 <sup>B1</sup> | JN935567 | JQ826845 | JQ825492 |
| <i>P. pollicaris</i> Clade IV   | LG 1792 <sup>B2</sup> | JN935572 | MD       | JQ825495 |
| <i>P. pollicaris</i> Clade IV   | LG 1815               | JN935573 | JQ826982 | MD       |
| <i>P. pollicaris</i> Clade IV   | LG 1845 <sup>B3</sup> | JN935574 | MD       | MD       |
| <i>P. pollicaris</i> Clade IV   | MTR 6733              | MD       | JQ826849 | JQ825494 |
| <i>P. pollicaris</i> Clade IV   | MTR 6822              | MD       | MD       | JQ825497 |
| <i>P. pollicaris</i> Clade VI   | MTR 3074              | JN935584 | JQ826963 | JQ825369 |
| <i>P. pollicaris</i> Clade VI   | MTR 3263              | JN935585 | JQ826960 | MD       |
| <i>P. pollicaris</i> Clade VI   | MTR 3287              | JN935586 | JQ826964 | MD       |
| <i>P. pollicaris</i> Clade VII  | CHUNB 36991           | JN935559 | JQ827012 | JQ825354 |
| <i>P. pollicaris</i> Clade VII  | CHUNB 36992           | JN935560 | MD       | JQ825351 |
| <i>P. pollicaris</i> Clade VII  | CHUNB 37001           | JN935561 | JQ827011 | JQ825352 |
| <i>P. pollicaris</i> Clade VII  | CHUNB 43849           | JN935562 | MD       | MD       |
| <i>P. pollicaris</i> Clade VII  | CHUNB 43850           | JN935563 | JQ827039 | JQ825317 |
| <i>P. pollicaris</i> Clade VII  | CHUNB 43852           | JN935564 | JQ827033 | MD       |
| <i>P. pollicaris</i> Clade VII  | CHUNB 58320           | MD       | JQ826993 | JQ825333 |
| <i>P. pollicaris</i> Clade VII  | LG 1310               | JN935568 | JQ827049 | MD       |
| <i>P. pollicaris</i> Clade VIII | LG 807                | JN935575 | JQ827102 | JQ825393 |
| <i>P. pollicaris</i> Clade VIII | LG 808                | JN935576 | JQ827107 | JQ825394 |
| <i>P. pollicaris</i> Clade VIII | LG 1011               | JN935566 | JQ827100 | JQ825390 |
| <i>P. pollicaris</i> Clade VIII | LG 1342               | JN935570 | JQ827123 | JQ825423 |
| <i>P. pollicaris</i> Clade VIII | LG 1343               | JN935571 | JQ827124 | JQ825424 |
| <i>P. pollicaris</i> Clade VIII | MTR 2346              | JN935580 | JQ827056 | MD       |
| <i>P. pollicaris</i> Clade VIII | MTR 2807              | JN935581 | JQ827057 | MD       |
| <i>P. pollicaris</i> Clade VIII | MTR 2958              | JN935582 | JQ827053 | MD       |
| <i>P. pollicaris</i> Clade VIII | MTR 2959              | JN935583 | JQ827054 | JQ825489 |
| <i>P. pollicaris</i> Clade VIII | MTR 3681              | JN935587 | JQ827073 | JQ825374 |
| <i>P. pollicaris</i> Clade VIII | MTR 3748              | JN935588 | JQ827133 | MD       |
| <i>P. pollicaris</i> Clade VIII | MTR 4960              | JN935589 | JQ827130 | MD       |

|                                 |                                    |          |          |          |
|---------------------------------|------------------------------------|----------|----------|----------|
| <i>P. pollicaris</i> Clade VIII | MTR 887020                         | JN935558 | JQ827087 | JQ825376 |
| <i>P. pollicaris</i> Clade VIII | MZUSP 92491                        | JN935590 | MD       | JX041417 |
| <i>P. przewalskii</i>           | TG 00105                           | JN935565 | JQ826885 | JQ825594 |
| <i>P. przewalskii</i>           | LG 1093 <sup>B9</sup>              | JN935569 | JQ826890 | JQ825593 |
| <i>P. przewalskii</i>           | MTD 43490 <sup>B10</sup>           | JN935578 | MD       | MD       |
| <i>P. przewalskii</i>           | MTD 43492 <sup>B11</sup>           | JN935579 | MD       | MD       |
| <i>P. przewalskii</i>           | MNCN 5903 <sup>B12</sup>           | JN935577 | MD       | JQ825362 |
| <i>P. przewalskii</i>           | LJAMM-CNP 12072                    | MD       | JQ826895 | JQ825577 |
| <i>P. przewalskii</i>           | LJAMM-CNP 12083                    | MD       | JQ826901 | JQ825583 |
| <i>P. przewalskii</i>           | <b>SMF 100495</b> <sup>B8</sup>    | MF278834 | MD       | MD       |
| <i>P. przewalskii</i>           | MNHNP 11412                        | MD       | JQ826880 | JQ825595 |
| <i>P. przewalskii</i>           | MNHNP 11426                        | MD       | JQ826879 | JQ825596 |
| <i>P. przewalskii</i>           | <b>MNHNP 11957</b> <sup>B6</sup>   | MH397465 | MD       | MD       |
| <i>P. przewalskii</i>           | <b>MNHNP 11958</b> <sup>B7</sup>   | MH397466 | MD       | MD       |
| <i>Phyllopezus</i> sp. nov.     | <b>MNHNP-TH 2-39</b> <sup>B5</sup> | MH397468 | MH412633 | MH412635 |
| <i>Phyllopezus</i> sp. nov.     | <b>MNHNP-TH 2-40</b> <sup>B4</sup> | MH397467 | MH412634 | MH412636 |

### Appendix S3

#### Pairwise genetic distances (in percentages) – 16S

|                                |                       |                                  |                    |                                |                          |                                    |                           |                            |                             |                                |  |  |  |  |  |  |  |  |  |  |
|--------------------------------|-----------------------|----------------------------------|--------------------|--------------------------------|--------------------------|------------------------------------|---------------------------|----------------------------|-----------------------------|--------------------------------|--|--|--|--|--|--|--|--|--|--|
| <i>Phyllopezus lutzae</i>      | <i>P. lutzae</i><br>0 |                                  |                    |                                |                          |                                    |                           |                            |                             |                                |  |  |  |  |  |  |  |  |  |  |
| <i>P. maranjonensis</i>        | 11.5                  | <i>P. maranjonensis</i><br><0.01 |                    |                                |                          |                                    |                           |                            |                             |                                |  |  |  |  |  |  |  |  |  |  |
|                                | 11.8                  | 0.3                              | <i>P. periosus</i> |                                |                          |                                    |                           |                            |                             |                                |  |  |  |  |  |  |  |  |  |  |
| <i>P. periosus</i>             | 14.6                  | 13.7                             | -                  |                                |                          |                                    |                           |                            |                             |                                |  |  |  |  |  |  |  |  |  |  |
|                                |                       | 14.0                             |                    |                                |                          |                                    |                           |                            |                             |                                |  |  |  |  |  |  |  |  |  |  |
| <i>P. przewalskii</i>          | 14.8                  | 13.7                             | 15.4               | <i>P. przewalskii</i><br><0.01 |                          |                                    |                           |                            |                             |                                |  |  |  |  |  |  |  |  |  |  |
|                                | 15.4                  | 14.6                             | 17.0               | 4.4                            | <i>P. pollicaris – I</i> |                                    |                           |                            |                             |                                |  |  |  |  |  |  |  |  |  |  |
| <i>P. pollicaris – I</i>       | 13.2                  | 13.7                             | 15.9               | 11.5                           | 0                        |                                    |                           |                            |                             |                                |  |  |  |  |  |  |  |  |  |  |
|                                |                       | 14.6                             |                    | 12.1                           |                          |                                    |                           |                            |                             |                                |  |  |  |  |  |  |  |  |  |  |
| <i>P. pollicaris – IV</i>      | 15.4                  | 14.0                             | 16.2               | 9.9                            | 13.7                     | <i>P. pollicaris – IV</i><br><0.01 |                           |                            |                             |                                |  |  |  |  |  |  |  |  |  |  |
|                                | 16.8                  | 14.3                             |                    | 11.0                           | 14.8                     | 0.3                                | <i>P. pollicaris – VI</i> |                            |                             |                                |  |  |  |  |  |  |  |  |  |  |
| <i>P. pollicaris – VI</i>      | 15.1                  | 14.0                             | 16.2               | 9.6                            | 13.2                     | 12.1                               | <0.01                     |                            |                             |                                |  |  |  |  |  |  |  |  |  |  |
|                                | 15.4                  | 16.5                             | 16.5               | 10.4                           | 13.2                     | 13.2                               | 0.5                       | <i>P. pollicaris – VII</i> |                             |                                |  |  |  |  |  |  |  |  |  |  |
| <i>P. pollicaris – VII</i>     | 15.4                  | 15.9                             | 15.9               | 11.5                           | 13.2                     | 13.2                               | 9.1                       | <0.01                      |                             |                                |  |  |  |  |  |  |  |  |  |  |
|                                | 16.5                  | 17.3                             | 17.9               | 14.0                           | 15.1                     | 15.7                               | 12.4                      | 6.6                        | <i>P. pollicaris – VIII</i> |                                |  |  |  |  |  |  |  |  |  |  |
| <i>P. pollicaris – VIII</i>    | 14.6                  | 13.7                             | 16.2               | 10.4                           | 12.4                     | 11.3                               | 8.2                       | 7.1                        | <0.01                       |                                |  |  |  |  |  |  |  |  |  |  |
|                                | 15.1                  | 14.8                             | 17.3               | 13.2                           | 14.3                     | 12.6                               | 9.9                       | 9.9                        | 3.3                         | <i>Phyllopezus – Los Altos</i> |  |  |  |  |  |  |  |  |  |  |
| <i>Phyllopezus – Los Altos</i> | 16.2                  | 15.9                             | 16.8               | 12.6                           | 13.2                     | 11.8                               | 12.4                      | 12.6                       | 11.8                        | <0.01                          |  |  |  |  |  |  |  |  |  |  |
|                                |                       | 16.2                             |                    | 14.3                           |                          |                                    | 12.6                      | 14.3                       | 12.1                        |                                |  |  |  |  |  |  |  |  |  |  |

Genetic uncorrected p-distances among clades (species formally described plus unnamed taxa according to Werneck et al. [19]), showing minimum and maximum values.

## Appendix S4

### Results of the ABGD assessment

#### 16S

Initial Partition with prior maximal distance P=2.15e-02

Distance Simple Dist MinSlope=0.700000

**Group[ 1 ] n: 2** ;id: *Phyllopezus\_lutzae*\_CHUNB-50461 *Phyllopezus\_lutzae*\_CHUNB-50463

**Group[ 2 ] n: 3** ;id: *Phyllopezus\_maranjonensis*\_ZFMK-84995 *Phyllopezus\_maranjonensis*\_ZFMK-84996 *Phyllopezus\_maranjonensis*\_ZFMK-84997

**Group[ 3 ] n: 1** ;id: *Phyllopezus\_periosus*\_MTR-887022

**Group[ 4 ] n: 7** ;id: *Phyllopezus\_pollicaris\_VII*\_CHUNB-36991 *Phyllopezus\_pollicaris\_VII*\_CHUNB-36992 *Phyllopezus\_pollicaris\_VII*\_CHUNB-37001 *Phyllopezus\_pollicaris\_VII*\_CHUNB-43849

*Phyllopezus\_pollicaris\_VII*\_CHUNB-43850 *Phyllopezus\_pollicaris\_VII*\_CHUNB-43852

*Phyllopezus\_pollicaris\_VII*\_LG-1310

**Group[ 5 ] n: 2** ;id: *Phyllopezus\_pollicaris\_I*\_JC-1185 *Phyllopezus\_pollicaris\_I*\_JC-1219

**Group[ 6 ] n: 14** ;id: *Phyllopezus\_pollicaris\_VIII*\_LG-807 *Phyllopezus\_pollicaris\_VIII*\_LG-808

*Phyllopezus\_pollicaris\_VIII*\_LG-1011 *Phyllopezus\_pollicaris\_VIII*\_LG-1342

*Phyllopezus\_pollicaris\_VIII*\_LG-1343 *Phyllopezus\_pollicaris\_VIII*\_MTR-2346

*Phyllopezus\_pollicaris\_VIII*\_MTR-2807 *Phyllopezus\_pollicaris\_VIII*\_MTR-2958

*Phyllopezus\_pollicaris\_VIII*\_MTR-2959 *Phyllopezus\_pollicaris\_VIII*\_MTR-3681

*Phyllopezus\_pollicaris\_VIII*\_MTR-3748 *Phyllopezus\_pollicaris\_VIII*\_MTR-4960

*Phyllopezus\_pollicaris\_VIII*\_MTR-887020 *Phyllopezus\_pollicaris\_VIII*\_MZUSP-92491

**Group[ 7 ] n: 8** ;id: *Phyllopezus\_przewalskii*\_LG-1093 *Phyllopezus\_przewalskii*\_MNCN-5903

*Phyllopezus\_przewalskii*\_MTD-43490 *Phyllopezus\_przewalskii*\_MTD-43492

*Phyllopezus\_przewalskii*\_TG-00105 *Phyllopezus\_przewalskii*\_MNHNP-11957

*Phyllopezus\_przewalskii*\_MNHNP-11958 *Phyllopezus\_przewalskii*\_SMF-100495

**Group[ 8 ] n: 1** ;id: *Phyllopezus\_pollicaris\_IV*\_LG-1309

**Group[ 9 ] n: 3** ;id: *Phyllopezus\_pollicaris\_IV*\_LG-1792 *Phyllopezus\_pollicaris\_IV*\_LG-1815

*Phyllopezus\_pollicaris\_IV*\_LG-1845

**Group[ 10 ] n: 3** ;id: *Phyllopezus\_pollicaris\_VI*\_MTR-3074 *Phyllopezus\_pollicaris\_VI*\_MTR-3263

*Phyllopezus\_pollicaris\_VI*\_MTR-3287

**Group[ 11 ] n: 2** ;id: *Phyllopezus\_sp*\_MNHNP-2-40 *Phyllopezus\_sp*\_MNHNP-2-39

#### Tree

```
((Phyllopezus_pollicaris_VIII_MTR-887020_group 6
:0.007828, (Phyllopezus_pollicaris_VIII_LG-1011_group 6
:0.001048, (Phyllopezus_pollicaris_VIII_LG-808_group 6
:0.001048, Phyllopezus_pollicaris_VIII_LG-807_group 6 :0.001048)
:-0.000000) :0.003782)
:0.010532, ((Phyllopezus_pollicaris_VIII_MZUSP-92491_group 6
:0.001048, Phyllopezus_pollicaris_VIII_MTR-4960_group 6 :0.001048)
:0.002471, (Phyllopezus_pollicaris_VIII_LG-1343_group 6
:0.001015, Phyllopezus_pollicaris_VIII_LG-1342_group 6 :0.001091)
:0.010198) :0.000468, (((((((Phyllopezus_sp_MNHNP-2-39
_group 11 :0.001090, Phyllopezus_sp_MNHNP-2-40_group 11 :0.001042)
:0.054671, (((((((Phyllopezus_przewalskii_SMF-100495_group 7
:0.004901, Phyllopezus_przewalskii_MTD-43490_group 7 :0.000254)
:0.002648, Phyllopezus_przewalskii_TG-00105_group 7 :-0.000674)
:0.001797, Phyllopezus_przewalskii_MTD-43492_group 7 :0.001014)
:0.000284, Phyllopezus_przewalskii_LG-1093_group 7 :0.000792)
:0.002448, Phyllopezus_przewalskii_MNCN-5903_group 7 :0.002889)
:0.017187, (Phyllopezus_przewalskii_MNHNP-11958_group 7
:0.001064, Phyllopezus_przewalskii_MNHNP-11957_group 7 :0.001064)
:0.023459) :0.010493)
:0.009700, (((Phyllopezus_pollicaris_IV_LG-1845_group 9
```



```
:0.001059,Phyllopezus_pollicaris_IV_LG-1815_group 9 :0.001059)
:0.000780,Phyllopezus_pollicaris_IV_LG-1792_group 9 :0.002398)
:0.038772,Phyllopezus_pollicaris_IV_LG-1309_group 8 :0.041760)
:0.018312) :0.004851,((Phyllopezus_pollicaris_I_JC-1219
_group 5 :0.004856,Phyllopezus_pollicaris_I_JC-1185_group 5 :-
0.002629) :0.068232,(Phyllopezus_periosus_MTR-887022_group
3 :0.083999,(((Phyllopezus_maranjonensis_ZFMK-84997_group 2
:0.001053,Phyllopezus_maranjonensis_ZFMK-84995_group 2 :0.001053)
:0.000883,Phyllopezus_maranjonensis_ZFMK-84996_group 2 :0.002275)
:0.051565,(Phyllopezus_lutzae_CHUNB-50463_group 1
:0.001048,Phyllopezus_lutzae_CHUNB-50461_group 1 :0.001048)
:0.059645) :0.007278) :0.019520)
:0.011039) :0.007160,((Phyllopezus_pollicaris_VI_MTR-3287
_group 10 :0.001053,Phyllopezus_pollicaris_VI_MTR-3074_group 10
:0.001053) :0.002826,Phyllopezus_pollicaris_VI_MTR-3263
_group 10 :0.002437) :0.050835)
:0.013014,((Phyllopezus_pollicaris_VII_LG-1310_group 4
:0.027765,(Phyllopezus_pollicaris_VII_CHUNB-37001_group 4
:0.001053,(Phyllopezus_pollicaris_VII_CHUNB-36992_group 4
:0.001053,Phyllopezus_pollicaris_VII_CHUNB-36991_group 4 :0.001053)
:-0.000000) :0.034742)
:0.001333,((Phyllopezus_pollicaris_VII_CHUNB-43852_group 4
:0.001042,Phyllopezus_pollicaris_VII_CHUNB-43849_group 4 :0.003196)
:0.002476,Phyllopezus_pollicaris_VII_CHUNB-43850_group 4 :0.002799)
:0.025206) :0.018747)
:0.020750,(Phyllopezus_pollicaris_VIII_MTR-3748_group 6
:0.014115,((Phyllopezus_pollicaris_VIII_MTR-2959_group 6
:0.001046,Phyllopezus_pollicaris_VIII_MTR-2958_group 6 :0.001046)
:0.002493,(Phyllopezus_pollicaris_VIII_MTR-2807_group 6
:0.001086,Phyllopezus_pollicaris_VIII_MTR-2346_group 6 :0.003098)
:0.001672) :0.009835) :0.001751)
:0.003941,Phyllopezus_pollicaris_VIII_MTR-3681_group 6 :0.012086)
:0.001059);
```

## Cytb

Partition with prior maximal distance P=3.59e-02

Distance Simple Dist MinSlope=0.700000

**Group[ 1 ] n: 3** ;id: Phyllopezus\_periosus\_CHUNB-61920 Phyllopezus\_periosus\_CHUNB-61921  
Phyllopezus\_periosus\_FRD-851

**Group[ 2 ] n: 1** ;id: Phyllopezus\_maranjonensis-ZFMK84995

**Group[ 3 ] n: 3** ;id: Phyllopezus\_pollicaris\_I\_JC-1153 Phyllopezus\_pollicaris\_I\_JC-1182  
Phyllopezus\_pollicaris\_I\_JC-1185

**Group[ 4 ] n: 2** ;id: Phyllopezus\_pollicaris\_II\_PV-1053 Phyllopezus\_pollicaris\_II\_PV-1059

**Group[ 5 ] n: 1** ;id: Phyllopezus\_pollicaris\_II\_CHUNB-55904

**Group[ 6 ] n: 1** ;id: Phyllopezus\_pollicaris\_III\_JC-1503

**Group[ 7 ] n: 1** ;id: Phyllopezus\_pollicaris\_III\_MTR-13452

**Group[ 8 ] n: 1** ;id: Phyllopezus\_pollicaris\_IV\_LG-1309

**Group[ 9 ] n: 1** ;id: Phyllopezus\_pollicaris\_IV\_LG-1815

**Group[ 10 ] n: 1** ;id: Phyllopezus\_pollicaris\_IV\_MTR-6733

**Group[ 11 ] n: 3** ;id: Phyllopezus\_pollicaris\_VI\_MTR-3074 Phyllopezus\_pollicaris\_VI\_MTR-3263  
Phyllopezus\_pollicaris\_VI\_MTR-3287

**Group[ 12 ] n: 2** ;id: Phyllopezus\_pollicaris\_VII\_CHUNB-36991 Phyllopezus\_pollicaris\_VII\_CHUNB-  
37001

**Group[ 13 ] n: 2** ;id: Phyllopezus\_pollicaris\_VII\_CHUNB-43850 Phyllopezus\_pollicaris\_VII\_CHUNB-

43852

**Group[ 14 ] n: 1 ;id: Phyllopezus\_pollicaris\_VII\_CHUNB-58320**

**Group[ 15 ] n: 1 ;id: Phyllopezus\_pollicaris\_VII\_LG-1310**

**Group[ 16 ] n: 13 ;id: Phyllopezus\_pollicaris\_VIII\_LG-807 Phyllopezus\_pollicaris\_VIII\_LG-808**

Phyllopezus\_pollicaris\_VIII\_LG-1011 Phyllopezus\_pollicaris\_VIII\_LG-1342

Phyllopezus\_pollicaris\_VIII\_LG-1343 Phyllopezus\_pollicaris\_VIII\_MTR-2346

Phyllopezus\_pollicaris\_VIII\_MTR-2807 Phyllopezus\_pollicaris\_VIII\_MTR-2958

Phyllopezus\_pollicaris\_VIII\_MTR-2959 Phyllopezus\_pollicaris\_VIII\_MTR-3681

Phyllopezus\_pollicaris\_VIII\_MTR-3748 Phyllopezus\_pollicaris\_VIII\_MTR-4960

Phyllopezus\_pollicaris\_VIII\_MTR-887020

**Group[ 17 ] n: 6 ;id: Phyllopezus\_przewalskii\_TG-00105 Phyllopezus\_przewalskii\_LG-1093**

Phyllopezus\_przewalskii\_LJAMM-CNP-12072 Phyllopezus\_przewalskii\_LJAMM-CNP-12083

Phyllopezus\_przewalskii\_MNHNP-11426 Phyllopezus\_przewalskii\_MNHNP-11412

**Group[ 18 ] n: 2 ;id: Phyllopezus\_sp\_MNHNP-2\_39 Phyllopezus\_sp\_MNHNP-2\_40**

**Tree**

```
((Phyllopezus_pollicaris_III_MTR-13452_group 7
:0.079409,Phyllopezus_pollicaris_III_JC-1503_group 6 :0.086196)
:0.002175,((((Phyllopezus_pollicaris_VIII_MTR-887020_group 16
:0.009058,(Phyllopezus_pollicaris_VIII_LG-1011_group 16
:0.001324,(Phyllopezus_pollicaris_VIII_LG-808_group 16
:0.000641,Phyllopezus_pollicaris_VIII_LG-807_group 16 :0.001482)
:0.000225) :0.013678)
:0.008630,(((Phyllopezus_pollicaris_VIII_MTR-4960_group 16
:0.015580,(Phyllopezus_pollicaris_VIII_LG-1343_group 16
:0.002421,Phyllopezus_pollicaris_VIII_LG-1342_group 16 :0.001826)
:0.015853) :0.005850,Phyllopezus_pollicaris_VIII_MTR-3681
_group 16 :0.022826)
:0.001869,Phyllopezus_pollicaris_VIII_MTR-3748_group 16 :0.021920)
:0.000579) :0.007370,((Phyllopezus_pollicaris_VIII_MTR-2959
_group 16 :0.000531,Phyllopezus_pollicaris_VIII_MTR-2958_group 16
:0.000531) :0.005988,(Phyllopezus_pollicaris_VIII_MTR-2807
_group 16 :0.001428,Phyllopezus_pollicaris_VIII_MTR-2346_group 16
:0.000695) :0.002448) :0.029300)
:0.050777,(((Phyllopezus_pollicaris_VII_LG-1310_group 15
:0.065087,((Phyllopezus_pollicaris_VII_CHUNB-43852_group 13
:0.004761,Phyllopezus_pollicaris_VII_CHUNB-43850_group 13 :0.003732)
:0.038563,(Phyllopezus_pollicaris_VII_CHUNB-37001_group 12
:0.002206,Phyllopezus_pollicaris_VII_CHUNB-36991_group 12 :0.000978)
:0.057551) :0.005182)
:0.006168,Phyllopezus_pollicaris_VII_CHUNB-58320_group 14 :0.062351)
:0.018437,((Phyllopezus_pollicaris_VI_MTR-3287_group 11
:0.000531,Phyllopezus_pollicaris_VI_MTR-3074_group 11 :0.000531)
:0.002027,Phyllopezus_pollicaris_VI_MTR-3263_group 11 :0.002750)
:0.085075) :0.000235)
:0.012226,((Phyllopezus_pollicaris_II_CHUNB-55904_group 5
:0.099794,((Phyllopezus_pollicaris_II_PV-1059_group 4
:0.000531,Phyllopezus_pollicaris_II_PV-1053_group 4 :0.000531)
:0.097655,((Phyllopezus_pollicaris_I_JC-1185_group 3
:0.000742,Phyllopezus_pollicaris_I_JC-1153_group 3 :0.002467)
:0.001495,Phyllopezus_pollicaris_I_JC-1182_group 3 :0.002137)
:0.098043) :0.004011)
:0.002778,(Phyllopezus_maranjonensis-ZFMK84995_group 2
:0.120459,(Phyllopezus_periosus_FRD-851_group 1
:0.000531,(Phyllopezus_periosus_CHUNB-61921_group 1
:0.000531,Phyllopezus_periosus_CHUNB-61920_group 1 :0.000531)
:-0.000000) :0.119987) :0.013589)
:0.005672) :0.001034,(((Phyllopezus_sp_MNHNP-2_40_group
```

```
18 :0.000573,Phyllopezus_sp_MNHNP-2_39_group 18 :0.000573)
:0.029664,((Phyllopezus_przewalskii_MNHNP-11412_group 17
:0.001760,Phyllopezus_przewalskii_MNHNP-11426_group 17 :0.002487)
:0.001402,(((Phyllopezus_przewalskii_LJAMM-CNP-12083_group 17
:0.001714,Phyllopezus_przewalskii_LJAMM-CNP-12072_group 17
:0.001471) :0.000259,Phyllopezus_przewalskii_LG-1093_group
17 :0.001343) :0.000633,Phyllopezus_przewalskii_TG-00105
_group 17 :0.001990) :0.003245) :0.021419)
:0.064860,((Phyllopezus_pollicaris_IV_MTR-6733_group 10
:0.065292,Phyllopezus_pollicaris_IV_LG-1309_group 8 :0.059558)
:0.025754,Phyllopezus_pollicaris_IV_LG-1815_group 9 :0.082294)
:0.006389) :0.003559);
```

## ND2

Partition with prior maximal distance P=3.59e-02

Distance Simple Dist MinSlope=0.700000

**Group[ 1 ] n: 1 ;id: Phyllopezus\_lutzae\_CHUNB-50461**

**Group[ 2 ] n: 1 ;id: Phyllopezus\_maranjonensis\_ZFMK-84996**

**Group[ 3 ] n: 2 ;id: Phyllopezus\_pollicaris\_II\_PV-1053 Phyllopezus\_pollicaris\_II\_PV-1059**

**Group[ 4 ] n: 1 ;id: Phyllopezus\_pollicaris\_II\_CHUNB-55904**

**Group[ 5 ] n: 2 ;id: Phyllopezus\_pollicaris\_III\_JC-1503 Phyllopezus\_pollicaris\_III\_MTR-887703**

**Group[ 6 ] n: 1 ;id: Phyllopezus\_pollicaris\_III\_MTR-13452**

**Group[ 7 ] n: 1 ;id: Phyllopezus\_pollicaris\_IV\_LG-1309**

**Group[ 8 ] n: 3 ;id: Phyllopezus\_pollicaris\_IV\_LG-1792 Phyllopezus\_pollicaris\_IV\_MTR-6733**

Phyllopezus\_pollicaris\_IV\_MTR-6822

**Group[ 9 ] n: 1 ;id: Phyllopezus\_pollicaris\_VI\_MTR-3074**

**Group[ 10 ] n: 3 ;id: Phyllopezus\_pollicaris\_VII\_CHUNB-36991 Phyllopezus\_pollicaris\_VII\_CHUNB-36992 Phyllopezus\_pollicaris\_VII\_CHUNB-37001**

**Group[ 11 ] n: 1 ;id: Phyllopezus\_pollicaris\_VII\_CHUNB-58320**

**Group[ 12 ] n: 1 ;id: Phyllopezus\_pollicaris\_VII\_CHUNB-43850**

**Group[ 13 ] n: 9 ;id: Phyllopezus\_pollicaris\_VIII\_LG-807 Phyllopezus\_pollicaris\_VIII\_LG-808**

Phyllopezus\_pollicaris\_VIII\_LG-1011 Phyllopezus\_pollicaris\_VIII\_MTR-887020

Phyllopezus\_pollicaris\_VIII\_LG-1342 Phyllopezus\_pollicaris\_VIII\_LG-1343

Phyllopezus\_pollicaris\_VIII\_MTR-3681 Phyllopezus\_pollicaris\_VIII\_MZUSP-92491

Phyllopezus\_pollicaris\_VIII\_MTR-2959

**Group[ 14 ] n: 6 ;id: Phyllopezus\_przewalskii\_LG-1093 Phyllopezus\_przewalskii\_TG-00105**

Phyllopezus\_przewalskii\_LJAMM-CNP-12072 Phyllopezus\_przewalskii\_LJAMM-CNP-12083

Phyllopezus\_przewalskii\_MNHNP-11412 Phyllopezus\_przewalskii\_MNHNP-11426

**Group[ 15 ] n: 2 ;id: Phyllopezus\_sp\_MNHNP-2\_39 Phyllopezus\_sp\_MNHNP-2\_40**

## Tree

```
((Phyllopezus_pollicaris_III_MTR-13452_group 6
:0.110150,(((Phyllopezus_pollicaris_II_PV-1059_group 3
:0.000564,Phyllopezus_pollicaris_II_PV-1053_group 3 :0.000564)
:0.108517,Phyllopezus_pollicaris_II_CHUNB-55904_group 4 :0.122296)
:0.005838,(Phyllopezus_maranjonensis_ZFMK-84996_group 2
:0.166941,Phyllopezus_lutzae_CHUNB-50461_group 1 :0.119366)
:0.012657) :0.005728)
:0.002404,(((Phyllopezus_pollicaris_VIII_MTR-2959_group 13
:0.021406,((Phyllopezus_pollicaris_VIII_MZUSP-92491_group 13
:0.013924,(Phyllopezus_pollicaris_VIII_MTR-3681_group 13
:0.016272,(Phyllopezus_pollicaris_VIII_LG-1343_group 13
:0.001670,Phyllopezus_pollicaris_VIII_LG-1342_group 13 :0.001716)
:0.010252) :0.003126)
```

```
:0.003253, (Phyllopezus_pollicaris_VIII_MTR-887020_group 13
:0.012280, (Phyllopezus_pollicaris_VIII_LG-1011_group 13
:0.000564, (Phyllopezus_pollicaris_VIII_LG-808_group 13
:0.000564, Phyllopezus_pollicaris_VIII_LG-807_group 13 :0.000564)
:-0.000000) :0.011986) :0.007038)
:0.006171) :0.063475, Phyllopezus_pollicaris_VI_MTR-3074
_group 9 :0.079965)
:0.006292, ((Phyllopezus_pollicaris_VII_CHUNB-43850_group 12
:0.069086, ((Phyllopezus_pollicaris_VII_CHUNB-37001_group 10
:0.000564, Phyllopezus_pollicaris_VII_CHUNB-36992_group 10 :0.000564)
:0.000773, Phyllopezus_pollicaris_VII_CHUNB-36991_group 10 :0.002049)
:0.061389) :0.005968, Phyllopezus_pollicaris_VII_CHUNB-58320
_group 11 :0.065865) :0.023282)
:0.018137, (Phyllopezus_pollicaris_III_MTR-887703_group 5
:0.021337, Phyllopezus_pollicaris_III_JC-1503_group 5 :0.013691)
:0.080173) :0.005596, (((Phyllopezus_sp_MNHNP-2_40_group
15 :0.000566, Phyllopezus_sp_MNHNP-2_39_group 15 :0.000566)
:0.020474, ((Phyllopezus_przewalskii_MNHNP-11426_group 14
:0.001945, Phyllopezus_przewalskii_MNHNP-11412_group 14 :0.001441)
:0.001771, (Phyllopezus_przewalskii_LJAMM-CNP-12083_group 14
:0.000564, (Phyllopezus_przewalskii_LJAMM-CNP-12072_group 14
:0.000564, (Phyllopezus_przewalskii_TG-00105_group 14
:0.003449, Phyllopezus_przewalskii_LG-1093_group 14 :-0.002028)
:0.002593) :-0.000000) :0.002781)
:0.017352) :0.079661, (((Phyllopezus_pollicaris_IV_MTR-6822
_group 8 :0.004932, Phyllopezus_pollicaris_IV_LG-1792_group 8
:0.007483) :0.004305, Phyllopezus_pollicaris_IV_MTR-6733
_group 8 :0.005087)
:0.050058, Phyllopezus_pollicaris_IV_LG-1309_group 7 :0.059956)
:0.044443) :0.014650);
```

**Figure S1**

Scales between 4<sup>th</sup> and 5<sup>th</sup> digital pads.

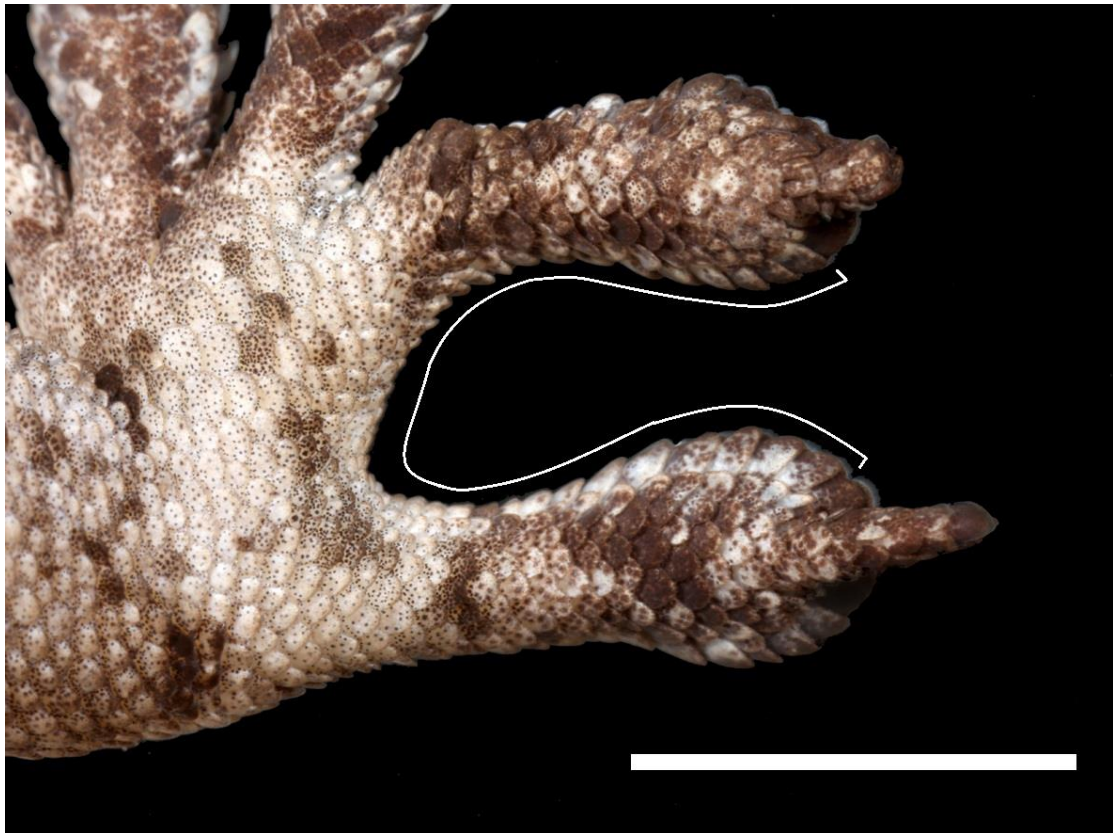

Detail of the right foot of *Phyllopezus* (SMF 100494) showing the line of lateral scales between the 4<sup>th</sup> and 5<sup>th</sup> digital pads. Scale bar = 5 mm.

**Figure S2**

Phylogenetic tree inferred from 16S using BI approach.

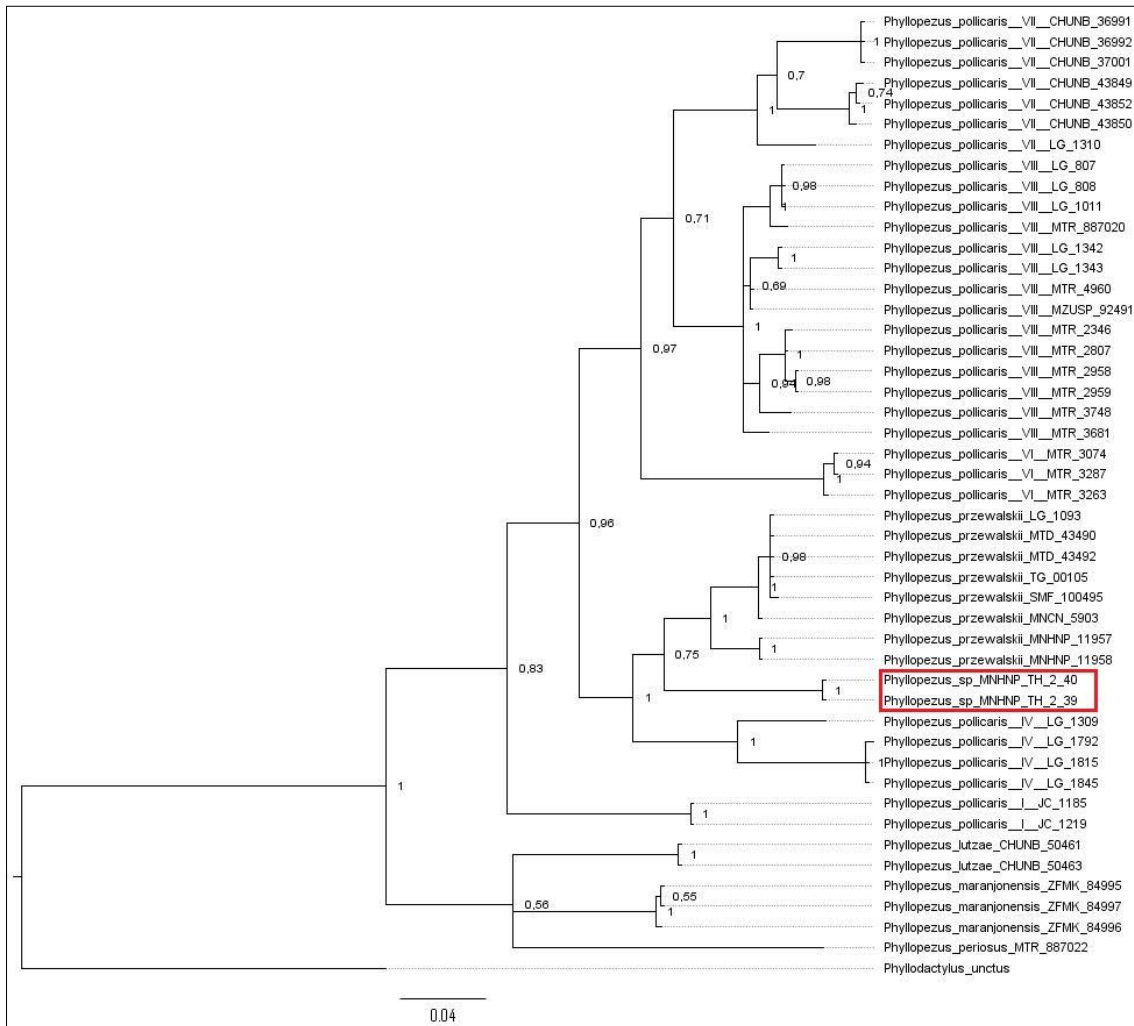

Phylogeny of the genus *Phyllopezus* using BI based on the mtDNA gene 16S. Numbers at the right of the nodes denote posterior probability. Bar at the bottom represents substitutions per site. Specimens from “Cordillera de los Altos” highlighted in the red box.

**Figure S3**

Phylogenetic tree inferred from 16S using ML approach.

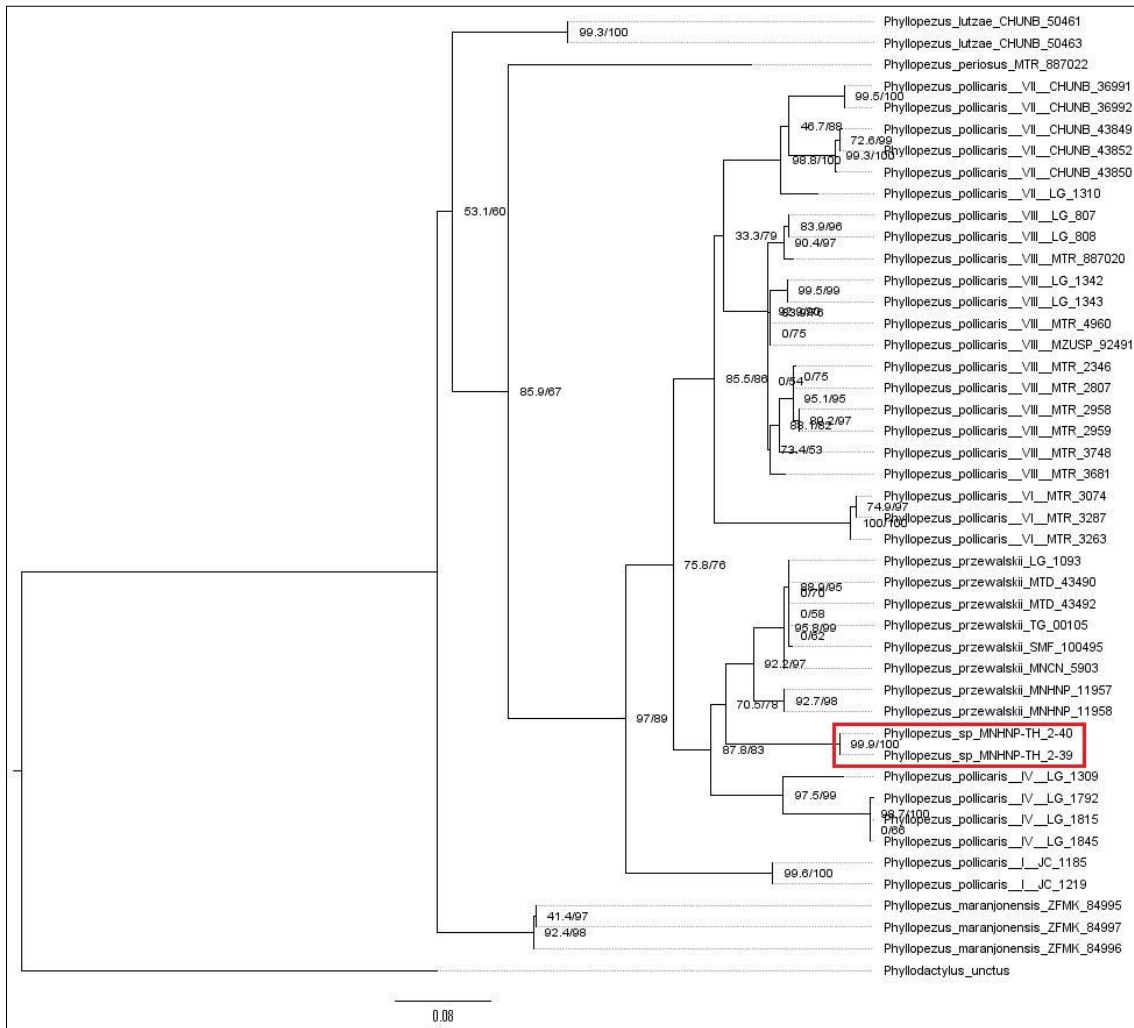

Phylogeny of the genus *Phyllopezus* using ML based on the mtDNA gene 16S. Numbers at the right of the nodes denote SH-aLRT/UFBoot (in percentages). Bar at the bottom represents substitutions per site. Specimens from “Cordillera de los Altos” highlighted in the red box.

**Figure S4**

Phylogenetic tree inferred from Cytb using BI approach.

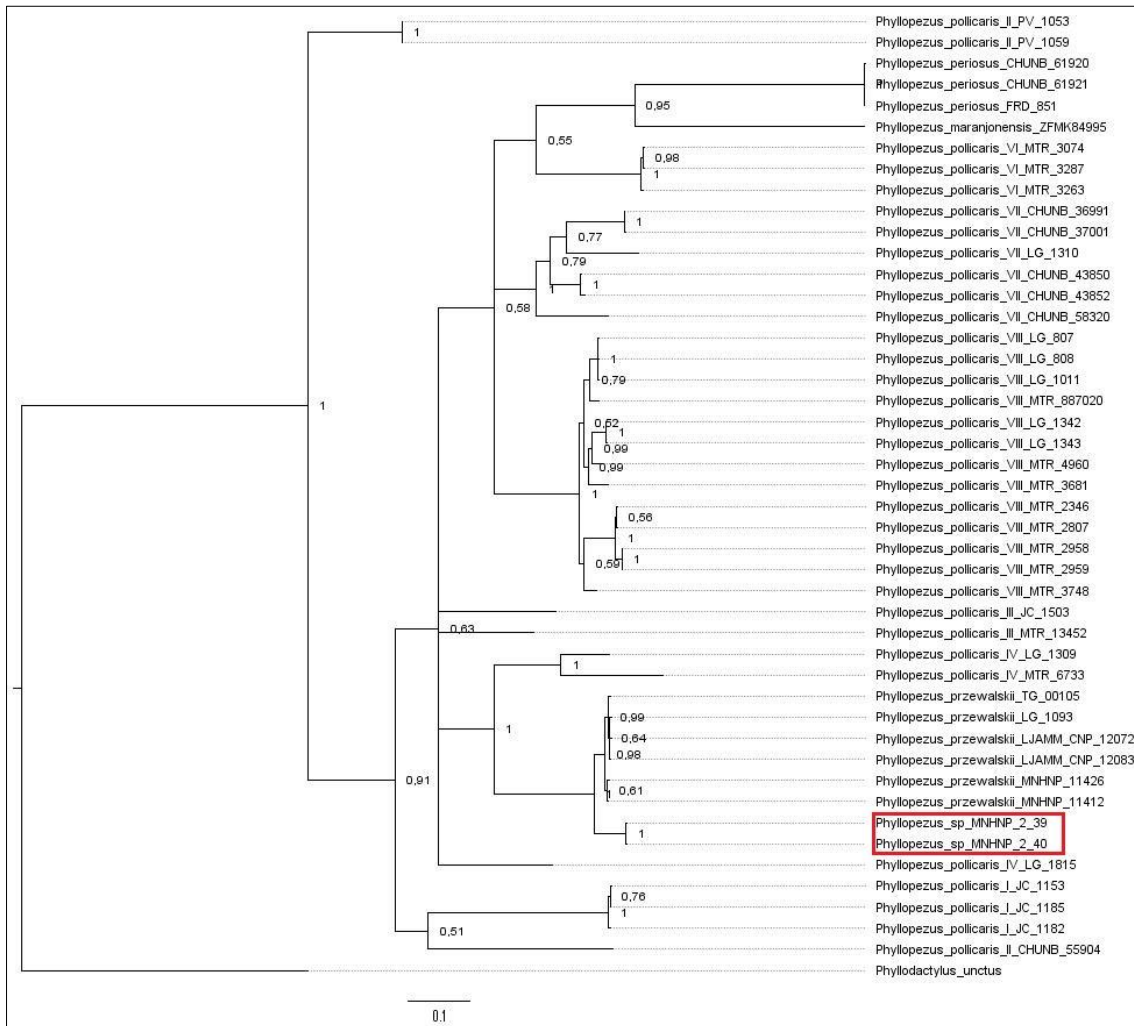

Phylogeny of the genus *Phyllopezus* using BI based on the mtDNA gene Cytb. Numbers at the right of the nodes denote posterior probability. Bar at the bottom represents substitutions per site. Specimens from “Cordillera de los Altos” highlighted in the red box.



**Figure S5**

Phylogenetic tree inferred from Cytb using ML approach.

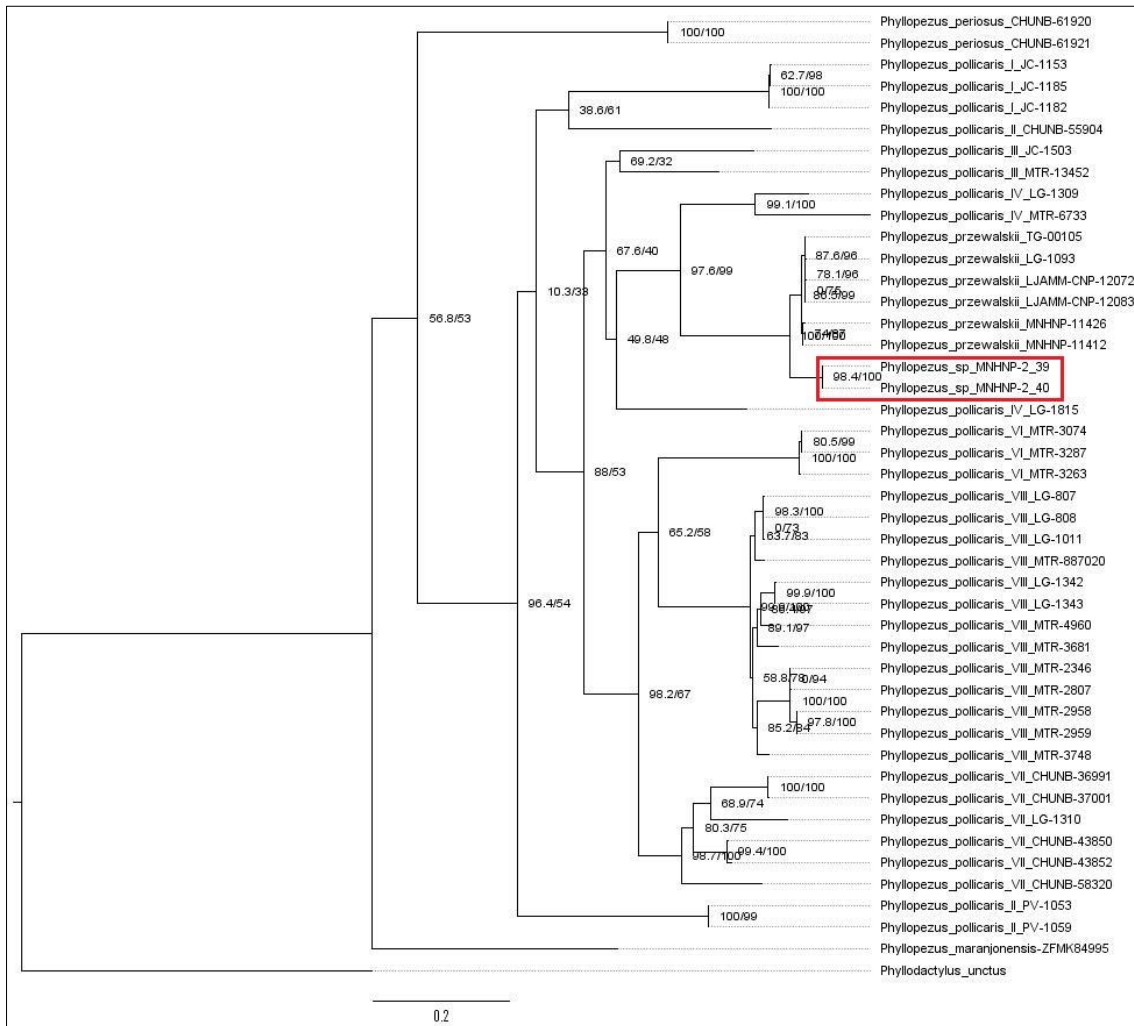

Phylogeny of the genus *Phyllopezus* using ML based on the mtDNA gene Cytb.

Numbers at the right of the nodes denote SH-aLRT/UFBoot (in percentages). Bar at the bottom represents substitutions per site. Specimens from “Cordillera de los Altos” highlighted in the red box.

**Figure S6**

Phylogenetic tree inferred from ND2 using BI approach.

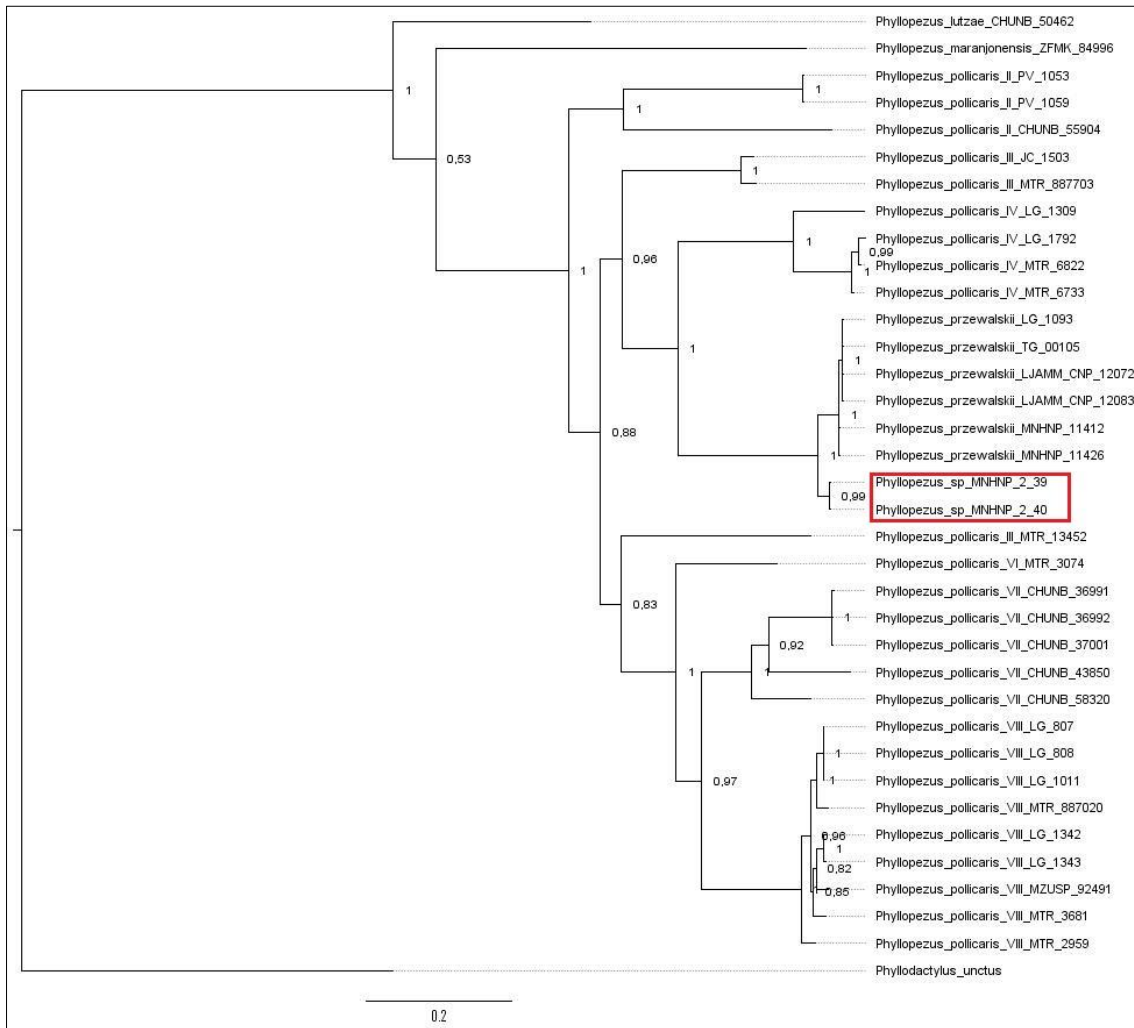

Phylogeny of the genus *Phyllopezus* using BI based on the mtDNA gene ND2. Numbers at the right of the nodes denote posterior probability. Bar at the bottom represents substitutions per site. Specimens from “Cordillera de los Altos” highlighted in the red box.

**Figure S7**

Phylogenetic tree inferred from ND2 using ML approach.

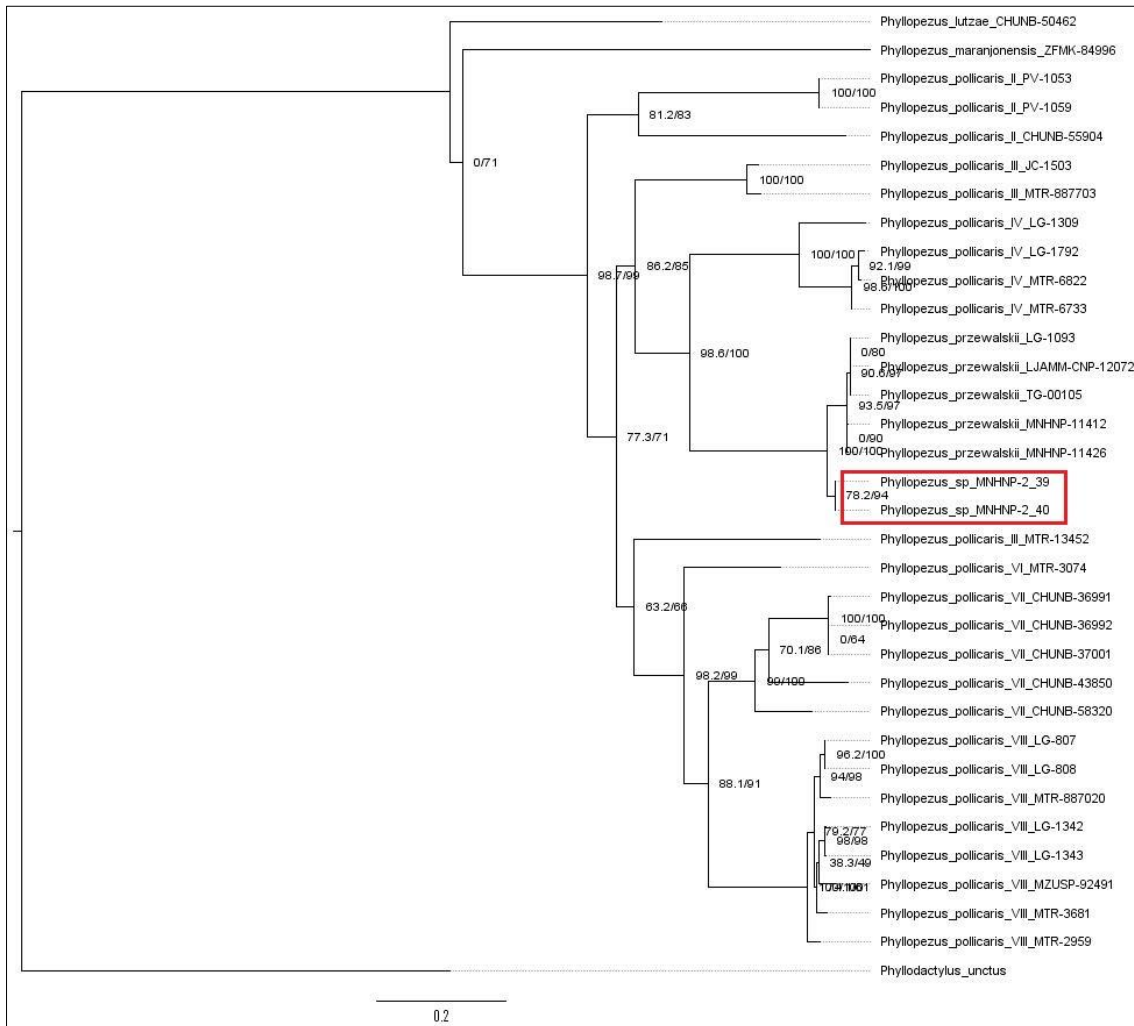

Phylogeny of the genus *Phyllopezus* using ML based on the mtDNA gene ND2.

Numbers at the right of the nodes denote SH-aLRT/UFBoot (in percentages). Bar at the bottom represents substitutions per site. Specimens from “Cordillera de los Altos” highlighted in the red box.

**Figure S8**

Phylogenetic tree inferred from concatenated genes, using BI approach.

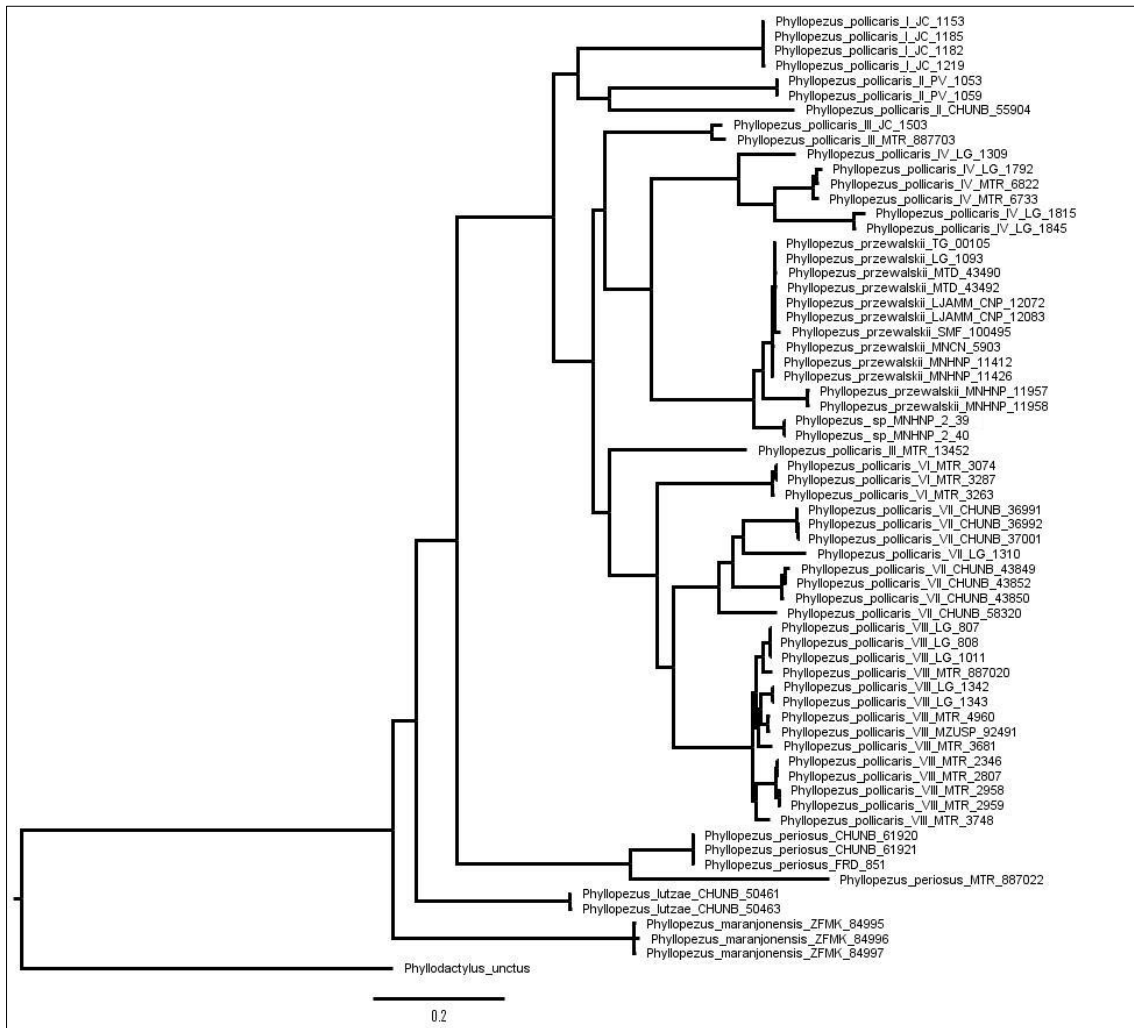

Phylogeny of the genus *Phyllopezus* using BI based on concatenated mtDNA genes 16S, Cytb, and ND2. Bar at the bottom represents substitutions per site.

**Figure S9**

Phylogenetic tree inferred from concatenated genes, using ML approach.

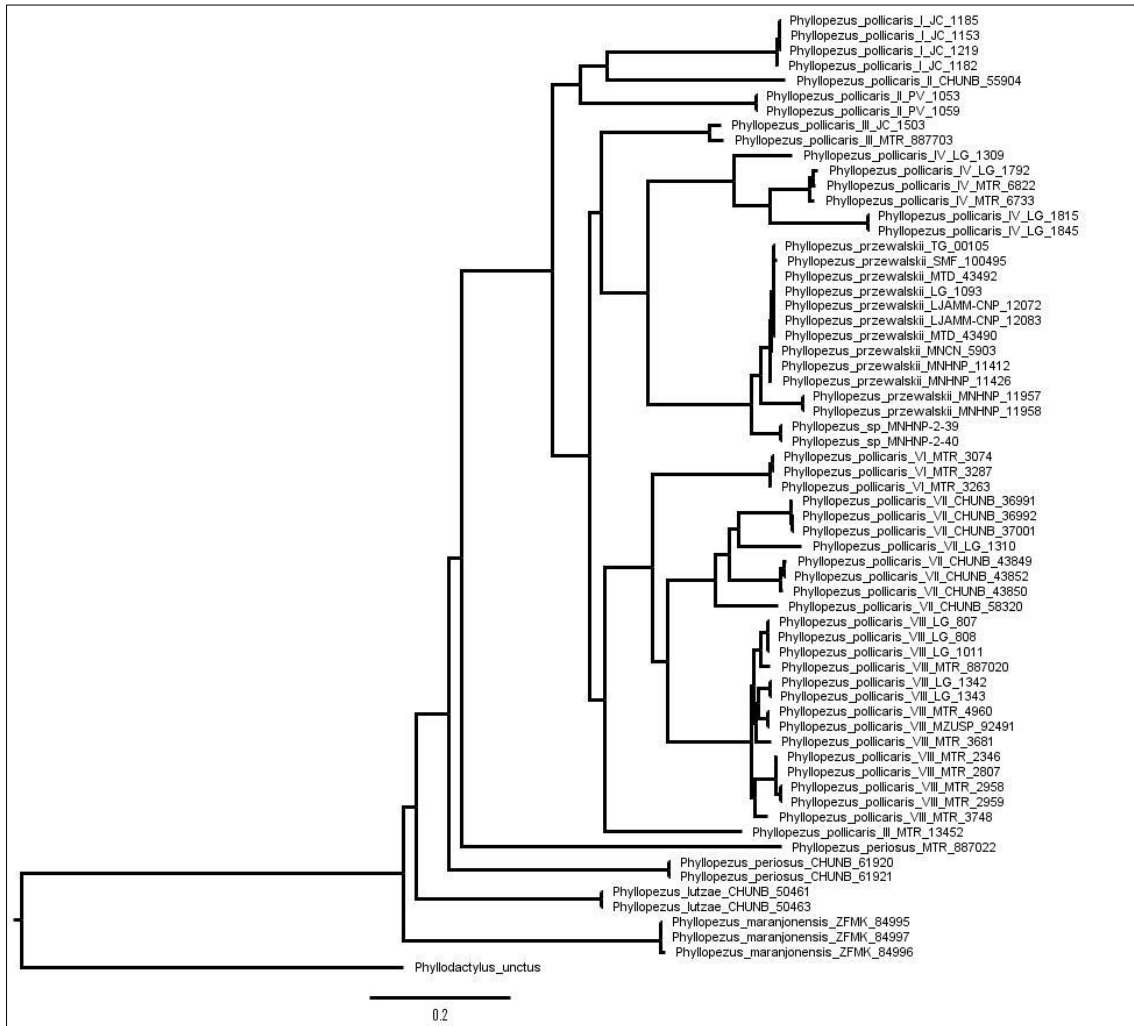

Phylogeny of the genus *Phyllopezus* using ML based on concatenated mtDNA genes 16S, Cytb, and ND2. Bar at the bottom represents substitutions per site.

**Figure S10**

Dorsal scalation.

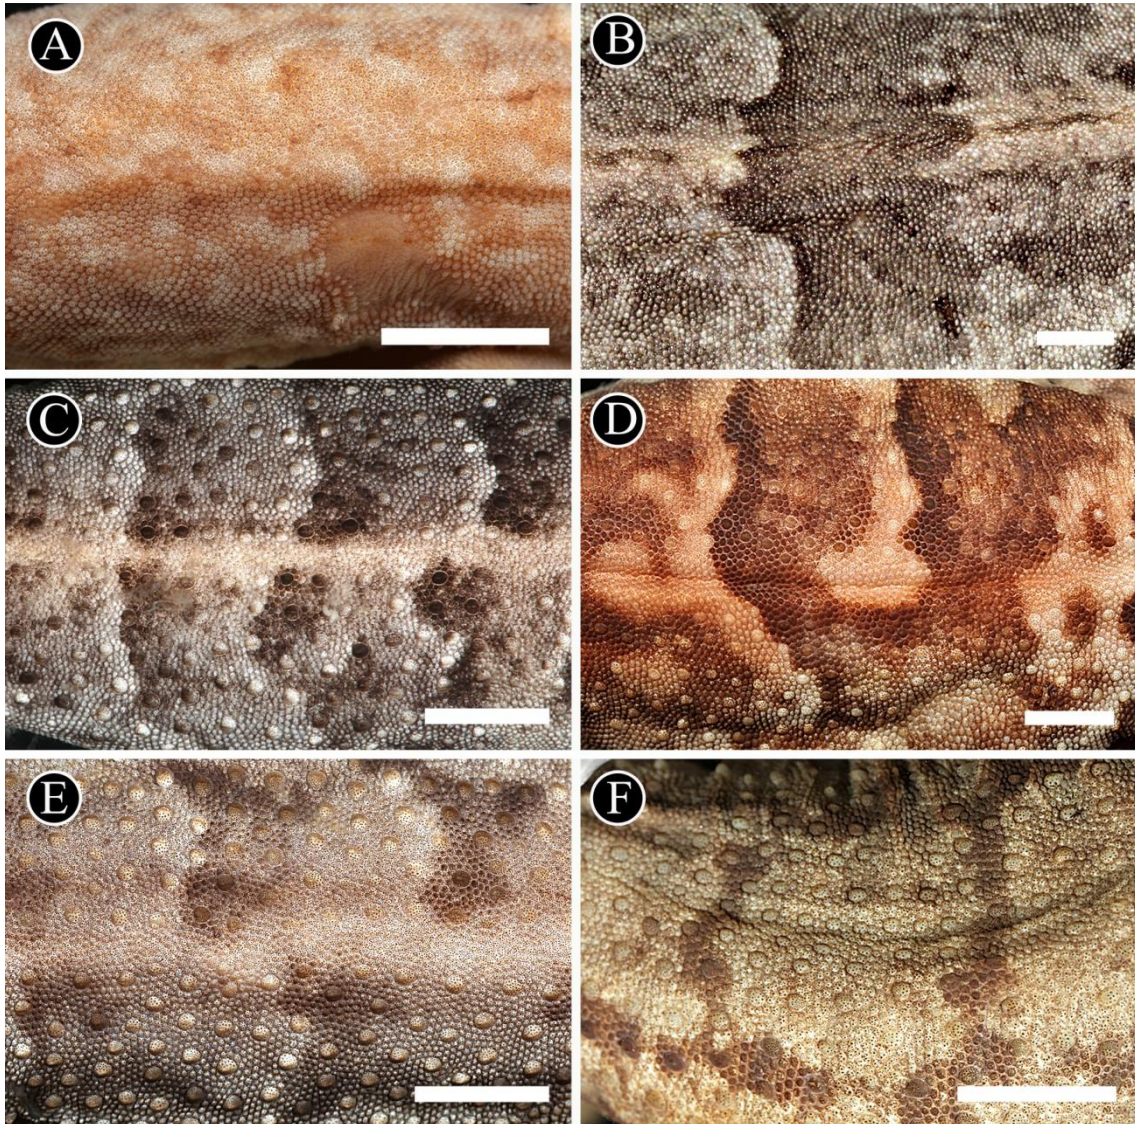

Dorsal scalation pattern of the named species of *Phyllopezus*: A- *P. lutzae* (MCZ 46190), B- *P. maranjonensis* (ZFMK 84995), C- *P. heuteri* (SMF 100494), D- *P. periosus* (MCZ 172930), E- *P. przewalskii* (SMF 100496), F- *P. pollicaris* (ZSM 165/0/1). Heads oriented to the right. Scale bars = 5 mm.

**Figure S11**

Head and lateral body scalation.

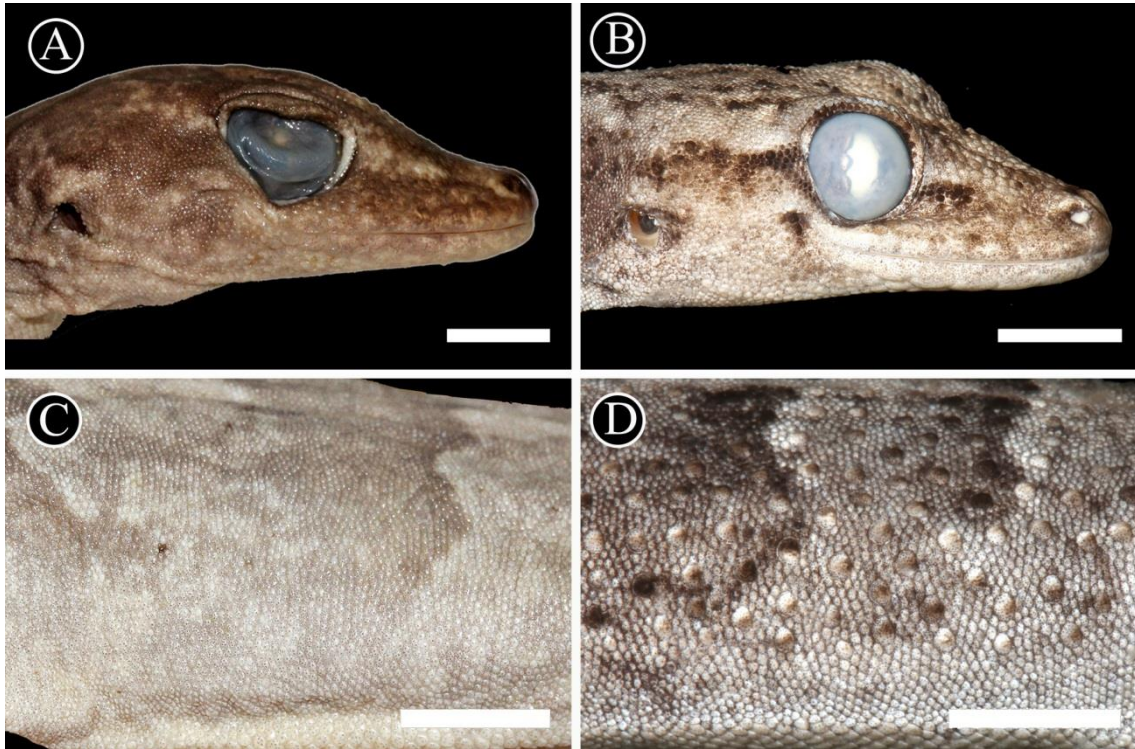

Differences in head scalation (above) and lateral body scalation (below) between *Phyllopezus maranjonensis* (A, C; ZMFK 84996) and *P. heuteri* (B, D; SMF 100494).

In C and D heads oriented to the left. Scale bars = 5 mm.

**Figure S12**

Ear opening.

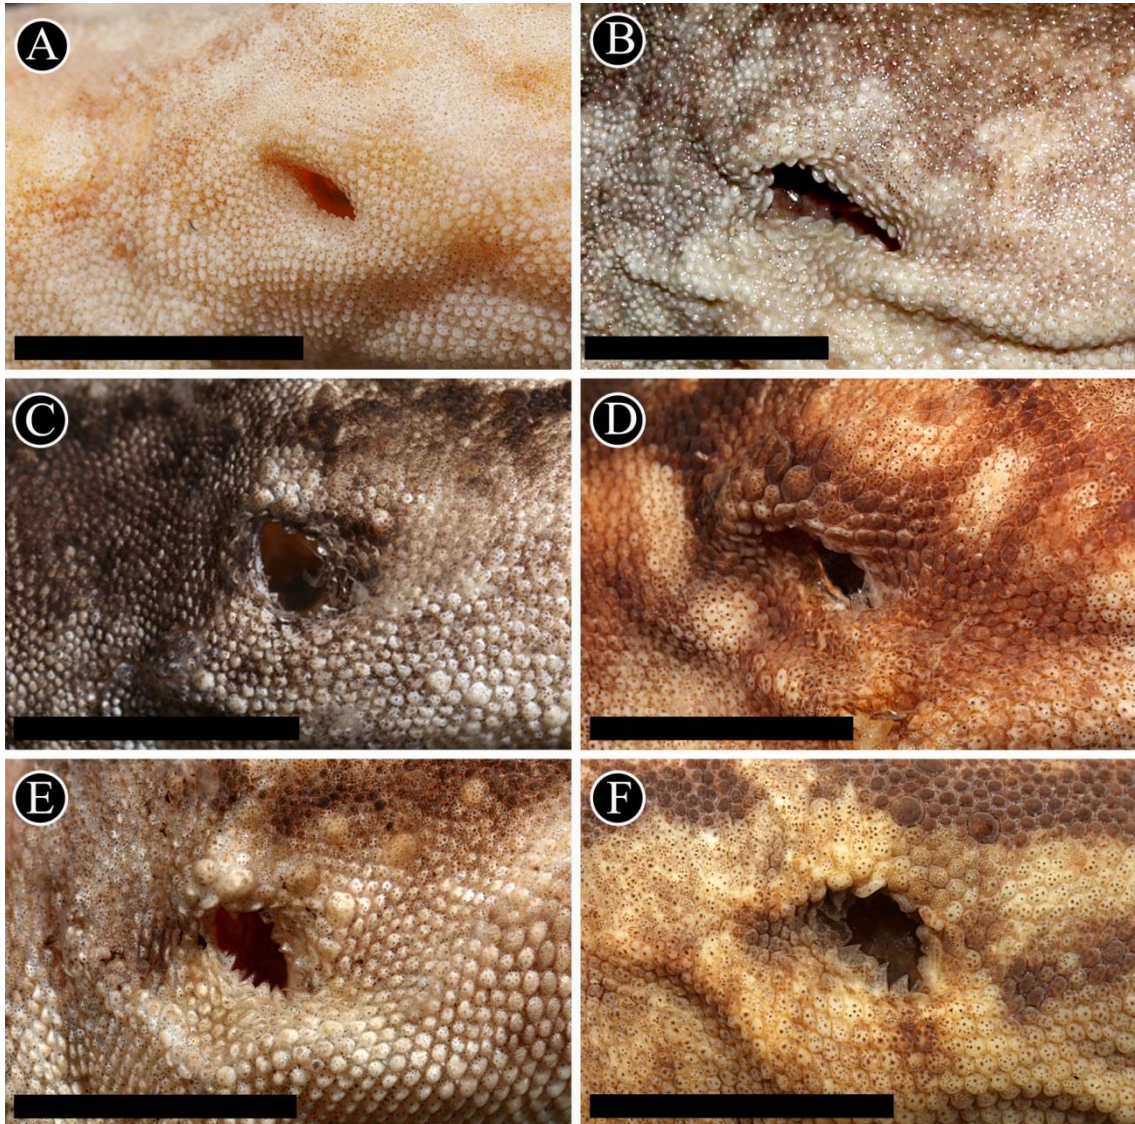

Scalation pattern around the ear opening of: A- *P. lutzae* (MCZ 46190), B- *P. maranjonensis* (ZFMK 84997), C- *P. heuteri* (SMF 100494), D- *P. periosus* (MCZ 172930), E- *P. przewalskii* (SMF 100496), and F- *P. pollicaris* (ZSM 165/0/1). Heads oriented to the right. Scale bars = 5 mm.



**Figure S13**

Mental scalation.

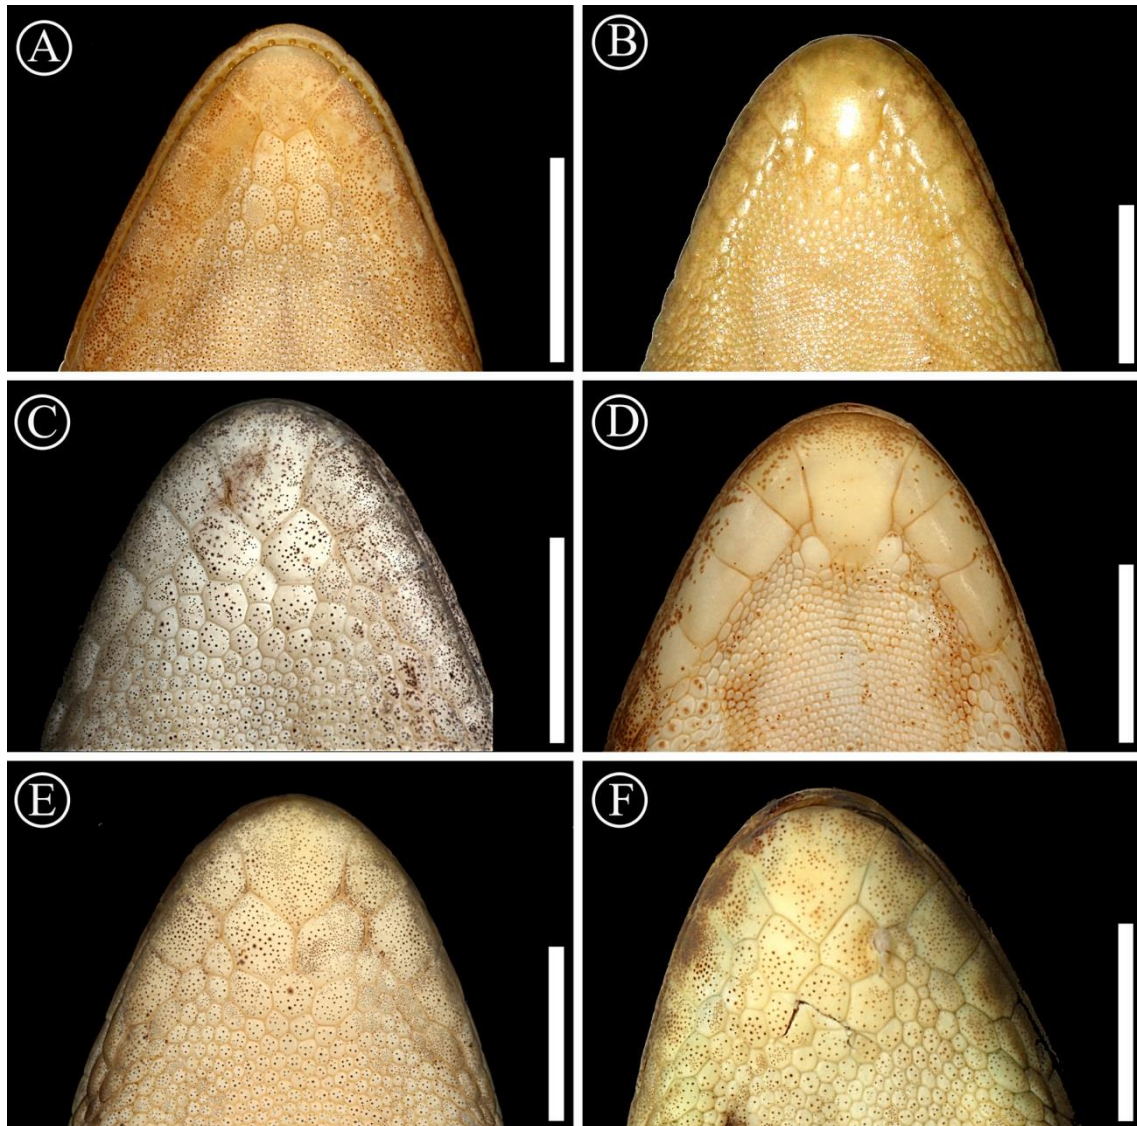

Detailed view of the chin region of: A- *P. lutzae* (MCZ 46190), B- *P. maranjonensis* (ZFMK 84997), C- *P. heuteri* (SMF 100494), D- *P. periosus* (MCZ 172929), E- *P. przewalskii* (SMF 100496), and F- *P. pollicaris* (ZSM 165/0/1). Scale bars = 5 mm.

**Figure S14**

Lateral scalation of the head.

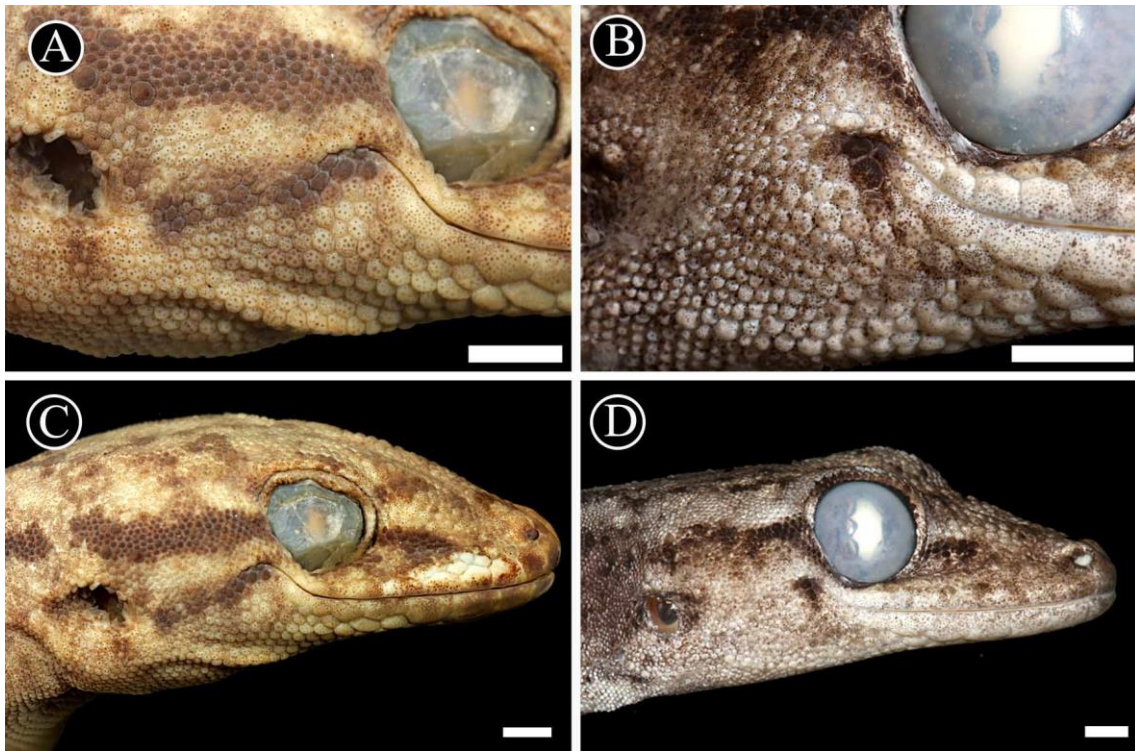

Differences in head scalation between *P. pollicaris* (A, C; ZSM 165/0/1) and *P. heuteri* (B, D; SMF 100494), showing homogeneous scalation in the mouth commissure of *P. pollicaris* (A) compared to the presence of some bigger scales in *P. heuteri*, and fewer tubercles between eye and ear opening in *P. pollicaris* (C) compared with *P. heuteri* (D). Scale bars = 2 mm.

### Figure S15

#### Prescapular scalation.

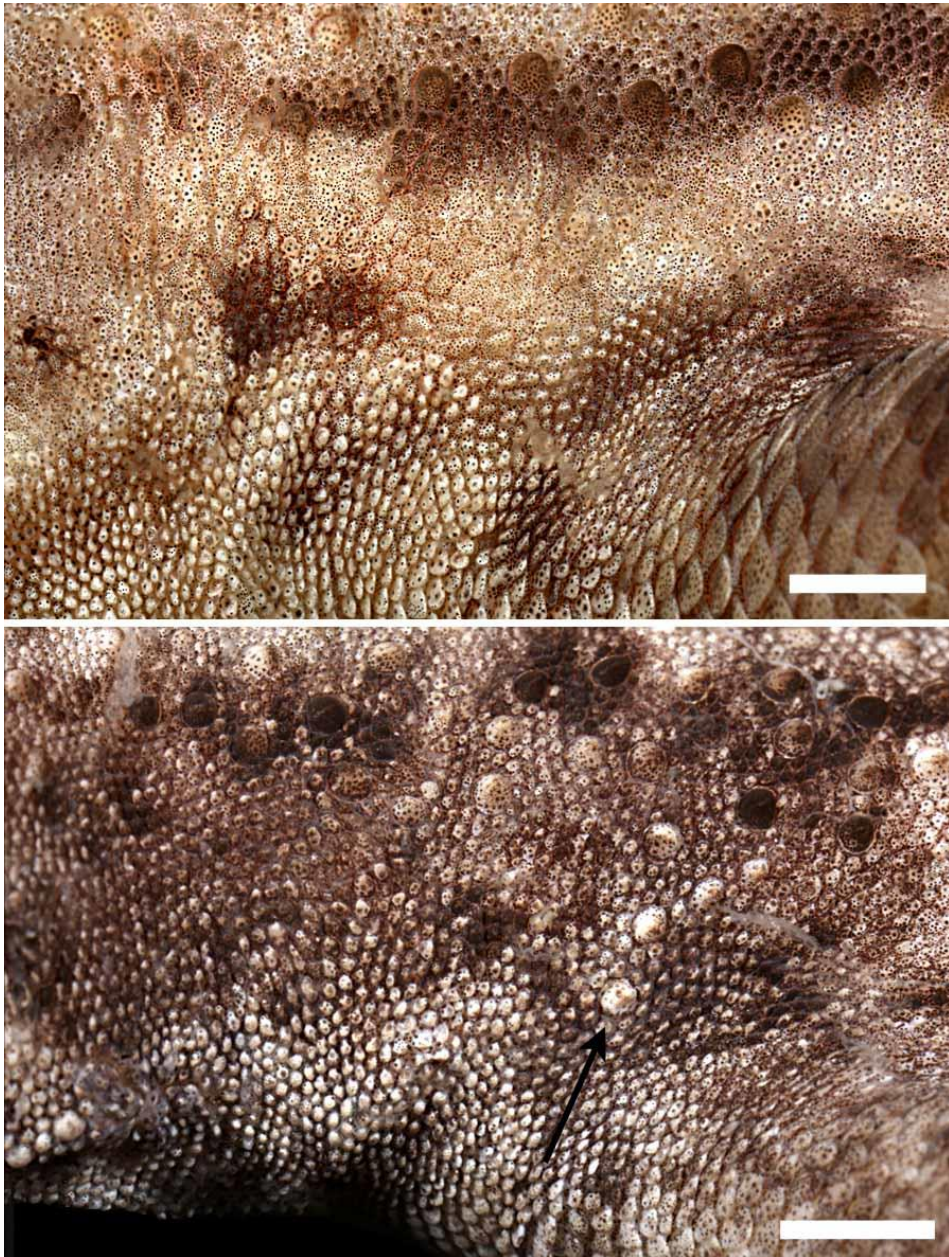

Differences in prescapular scalation of *P. przewalskii* (above, SMF 100496) and *P. heuteri* (below, SMF 100494). Note the tubercles intermingled with smaller scales in *P. przewalskii* compared with the homogeneous scalation in *P. heuteri*. Head to the left. Scale bars = 2 mm.
